# Supplementary material for: An integrated theoretical study on natural alkaloids as SARS-CoV-2 main protease inhibitors: a step toward discovery of potential drug candidates with anti-COVID-19 activity
Source: Royal Society of Chemistry journal article supplement (doi:10.1039/d4ra06536k), 2025-01-01
Supplement: d4ra06536k1.pdf [file d4ra06536k1.pdf]

**An integrated theoretical study on natural alkaloids as SARS-CoV-2 main protease inhibitors: A step toward discovery of potential drug candidate with anti-covid-19 activity**

**Shagufta Parveen<sup>1</sup>, Laiba Shahbaz<sup>1</sup>, Nusrat Shafiq<sup>1\*</sup>, Maryam Rashid<sup>1</sup>, Mohamed Mohany<sup>2</sup>, Mingkun Zhu<sup>3,4</sup>**

<sup>1</sup>Synthetic and Natural Products Discovery (SNPD) Laboratory, Department of Chemistry, Government College Women University Faisalabad-38000, Pakistan

<sup>2</sup>Department of Pharmacology and Toxicology, College of Pharmacy, King Saud University, P.O. Box 55760, Riyadh 11451, Saudi Arabia.  
[mmohany@ksu.edu.sa](mailto:mmohany@ksu.edu.sa)

<sup>3</sup>Jiangsu Key Laboratory of Sericultural Biology and Animal Biotechnology, School of Biotechnology, Jiangsu University of Science and Technology, Zhenjiang 212100, China.  
[mkzhu085@just.edu.cn](mailto:mkzhu085@just.edu.cn)

<sup>4</sup>Key Laboratory of Silkworm and Mulberry Genetic Improvement, Ministry of Agriculture and Rural Affairs, The Sericultural Research Institute, Chinese Academy of Agricultural Sciences, Zhenjiang 212100, China

**Corresponding Authors: Dr. Nusrat Shafiq, Assistant Professor**  
**Corresponding Address: [dr.nusratshafiq@gcwuf.edu.pk](mailto:dr.nusratshafiq@gcwuf.edu.pk); [gqumarin@gmail.com](mailto:gqumarin@gmail.com)**  
ORCID: [orcid.org/0000-0002-3270-4227](https://orcid.org/0000-0002-3270-4227)

Table S-1: Dataset of antiparasitic natural alkaloids with their IC<sub>50</sub> values and their sources

| S No | Name         | Formula                                         | Smiles                                                           | Activity                                                      | Structure                                                                             | IC <sub>50</sub> /EC <sub>50</sub> | Source                                 | Reference                          |
|------|--------------|-------------------------------------------------|------------------------------------------------------------------|---------------------------------------------------------------|---------------------------------------------------------------------------------------|------------------------------------|----------------------------------------|------------------------------------|
|      |              |                                                 |                                                                  |                                                               |                                                                                       | μM / nm / μg/mL / mM               |                                        |                                    |
| 1    | Dicentrinone | C <sub>19</sub> H <sub>13</sub> NO <sub>5</sub> | <chem>COC1=C(C=C2C(=C1)C3=C4C(=CC5=C3OC(O5)C=CN=C4C2=O)OC</chem> | Against free trypomastigotes of the Ystrain of <i>T.cruzi</i> | 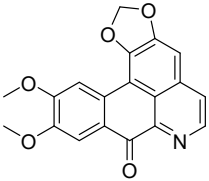 | 16.4 μM                            | fresh leaves of <i>Ocotea puberula</i> | (Fernández <i>et al.</i> , 2021a). |

|   |                      |                                                 |                                                                                 |                                                                |                                                                                       |          |                                                |                                    |
|---|----------------------|-------------------------------------------------|---------------------------------------------------------------------------------|----------------------------------------------------------------|---------------------------------------------------------------------------------------|----------|------------------------------------------------|------------------------------------|
| 2 | Duguetine            | C <sub>20</sub> H <sub>21</sub> NO <sub>5</sub> | <chem>CN1CCC2=CC3=C(C4=C2C1C(C5=CC(=C(C=C54)OC)OC)O)OCO3</chem>                 | Against free trypomastigotes of the Ystrain of <i>T. cruzi</i> | 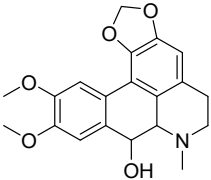   | 9.32 μM  | fresh leaves of <i>Ocotea puberula</i>         | (Fernández <i>et al.</i> , 2021a). |
| 3 | Flinderole A         | C <sub>32</sub> H <sub>40</sub> N <sub>4</sub>  | <chem>CC(=CC1CC(N2C1=C(C3=CC=CC=C32)CCN(C)C)C=CC4=C(C5=CC=CC=C5N4)CCNC)C</chem> | against <i>P. falciparum</i> 3D7 strain                        |    | 0.75 μM  | Australian species <i>Flindersia acuminata</i> | (Fernandez <i>et al.</i> , 2010).  |
| 4 | Liriodenine          | C <sub>17</sub> H <sub>9</sub> NO <sub>3</sub>  | <chem>C1OC2=C(O1)C3=C4C(=C2)C=CN=C4C(=O)C5=CC=CC=C53</chem>                     | against the trypomastigote of <i>T. cruzi</i>                  |   | 14.5 μM  | <i>Annona foetida</i>                          | (Fernández <i>et al.</i> , 2021a). |
| 5 | O-methylmoschatoline | C <sub>19</sub> H <sub>15</sub> NO <sub>4</sub> | <chem>COc1c2ccnc3c2c(c(c1OC)OC)-c4ccccc4C3=O</chem>                             | against the trypomastigote of <i>T. cruzi</i>                  |  | 11.83 μM | <i>Annona foetida</i>                          | (Fernández <i>et al.</i> , 2021a). |

|   |                                      |                                                 |                                                                                |                                                 |                                                                                      |         |                                                    |                                    |
|---|--------------------------------------|-------------------------------------------------|--------------------------------------------------------------------------------|-------------------------------------------------|--------------------------------------------------------------------------------------|---------|----------------------------------------------------|------------------------------------|
| 6 | ancistroealaine A                    | C <sub>26</sub> H <sub>29</sub> NO <sub>4</sub> | <chem>Cc1cc2c(ccc(c2c(c1)OC)OC)c3c(cc(c4c3CC(N=C4C)C)OC)OC</chem>              | against trypomastigotes (Tulahuen C4, L6 cells) | 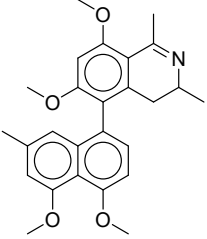  | 5.6 μM  | isolated from lianas from the Ancistrocladus genus | (Fernández <i>et al.</i> , 2021a). |
| 7 | 6,5'-O,O-didemethylancistroealaine A | C <sub>24</sub> H <sub>25</sub> NO <sub>4</sub> | <chem>Cc1c(cc(OC)c2c1c(c3c(CC(C)N=C4C)c4c(OC)cc3O[H])ccc2O[H])</chem>          | against trypomastigotes (Tulahuen C4, L6 cells) |   | 16.3 μM | isolated from lianas from the Ancistrocladus genus | (Fernández <i>et al.</i> , 2021a). |
| 8 | 6-O-demethylancistroealaine A        | C <sub>25</sub> H <sub>27</sub> NO <sub>4</sub> | <chem>OC1=C(C2=C3C=C(C)C=C(OC)C3=C(OC)C=C2)C(C[C@H](C)N=C4C)=C4C(OC)=C1</chem> | against trypomastigotes (Tulahuen C4, L6 cells) |  | 25.9 μM | isolated from lianas from the Ancistrocladus genus | (Fernández <i>et al.</i> , 2021a). |

|    |                     |                                                               |                                                                                       |                                         |                                                                                      |          |                                                           |                                    |
|----|---------------------|---------------------------------------------------------------|---------------------------------------------------------------------------------------|-----------------------------------------|--------------------------------------------------------------------------------------|----------|-----------------------------------------------------------|------------------------------------|
| 9  | Flinderole B        | C <sub>34</sub> H <sub>44</sub> N <sub>4</sub>                | <chem>CC(=CC1CC(N2C1=C(C3=CC=CC=C3)CCN(C)C)(C)C=CC4=C(C5=CC=C(C=C5N4)CCN(C)C)C</chem> | against <i>P. falciparum</i> 3D7 strain | 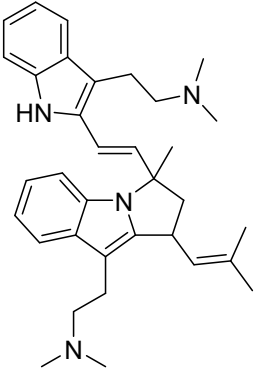  | 0.21 μM  | <i>F. amboinensis</i>                                     | (Fernandez <i>et al.</i> , 2010).  |
| 10 | ancistrotanzanine B | C <sub>26</sub> H <sub>29</sub> N <sub>4</sub> O <sub>4</sub> | <chem>CC1CC2=C(C(=CC(=C2C(=N1)C)OC)OC)C3=C4C=C(C=C(C4=C(C=C3)OC)OC)C</chem>           | against β-gal Tulahuen trypomastigotes  |   | 3.58 μM  | isolated from lianas from the <i>Ancistrocladus</i> genus | (Fernández <i>et al.</i> , 2021a). |
| 11 | ancistectorine D    | C <sub>25</sub> H <sub>27</sub> N <sub>4</sub> O <sub>4</sub> | <chem>CC1CC2=C(C3=C4C=C(C)C=C(OC)C4=C(O[H])C=C3)C(OC)=CC(OC)=C2C(C)=N1</chem>         | against <i>T. cruzi</i>                 |  | 4.439 μM | isolated from lianas from the <i>Ancistrocladus</i> genus | (Fernández <i>et al.</i> , 2021a). |

|    |                                         |                                                 |                                                                                                                                                                                                                 |                     |                                                                                      |         |                                                    |                                    |
|----|-----------------------------------------|-------------------------------------------------|-----------------------------------------------------------------------------------------------------------------------------------------------------------------------------------------------------------------|---------------------|--------------------------------------------------------------------------------------|---------|----------------------------------------------------|------------------------------------|
| 12 | 5-epi-4'-O-demethylancistrobertsonine C | C <sub>26</sub> H <sub>31</sub> NO <sub>4</sub> | <chem>CC1=CC=C2C(OC)=CC=C(C3=C(OC)C=C(O)C4=C3C[C@H](C)N(C)[C@@H]4C)C2=C1</chem>                                                                                                                                 | against T. cruzi    | 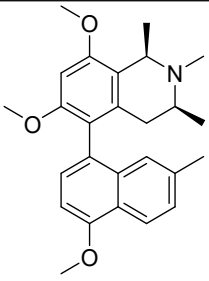  | 11.1 μM | isolated from lianas from the Ancistrocladus genus | (Fernández <i>et al.</i> , 2021a). |
| 13 | Ancistotectorine                        | C <sub>26</sub> H <sub>31</sub> NO <sub>4</sub> | <chem>COC1=CC=CC2=C(C(=O)=C12)C1=C(OC)C2=C(C[C@@H](C)N(C)[C@@H]2C)C=C1OC</chem>                                                                                                                                 | against T. cruzi    |   | 10.2 μM | isolated from lianas from the Ancistrocladus genus | (Fernández <i>et al.</i> , 2021a). |
| 14 | .Ancistrotanzanine A                    | C <sub>25</sub> H <sub>27</sub> NO <sub>4</sub> | <chem>[H]OC1=C2C(OC([H]))([H])[H])=C([H])C([H])=C([H])C2=C([H])C(=C1C1=C(C(OC([H]))([H])[H])C([H])=C(OC([H]))([H])[H])C2=C1C([H])([H])[C@@]([H])([H]15)(N=C2C([H])([H])[H])C([H])([H])[H])C([H])([H])[H]</chem> | against T. cruzi    |  | 4.20 μM | isolated from lianas from the Ancistrocladus genus | (Fernández <i>et al.</i> , 2021a). |
| 15 | 4'-O-demethylancistrocl                 | C <sub>25</sub> H <sub>28</sub> NO <sub>4</sub> | <chem>[H]OC1=C(C(C([H]))([H])[H])=</chem>                                                                                                                                                                       | against Tulahuen C4 |                                                                                      | 0.03μM  | isolated from lianas from the                      | (Fernández <i>et al.</i> , 2021a). |

|    |                                      |            |                                                                                                                                                                                              |                                                 |                                                                                       |         |                                                    |                                    |
|----|--------------------------------------|------------|----------------------------------------------------------------------------------------------------------------------------------------------------------------------------------------------|-------------------------------------------------|---------------------------------------------------------------------------------------|---------|----------------------------------------------------|------------------------------------|
|    | adinium A                            |            | <chem>C(C2=C([N+]3=C(C([H])([H])[H])C4=C(C([H])([C@@]3(C([H])([H])([H])[H])C([H])=C(C([H])=C4OC([H])([H])[H])O[CH]C([H])=C(C(OC([H])([H])[H])=C12)[H])[H])</chem>                            | trypomastigotes of T. cruzi                     | 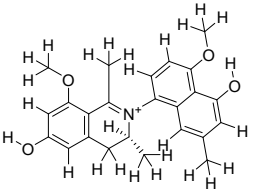   |         | Ancistrocladus genus                               |                                    |
| 16 | 6,4'-O-didemethylancistrocladinium A | C24H26NO4+ | <chem>[H]OC1=C(C(C([H])([H])[H])=C(C2=C([N+]3=C(C([H])([H])[H])C4=C(C([H])([C@@]3(C([H])([H])([H])[H])C([H])=C(C([H])=C4OC([H])([H])[H])O[CH]C([H])=C(C(OC([H])([H])[H])=C12)[H])[H])</chem> | against Tulahuen C4 trypomastigotes of T. cruzi |    | 6.0 μM  | isolated from lianas from the Ancistrocladus genus | (Fernández <i>et al.</i> , 2021a). |
| 17 | Mbandakamine B2                      | C49H54N2O8 | <chem>OC1=CC(C)=C(C2=CC(C3=C(O)C=C(OC)C4=C3C[C@H](C</chem>                                                                                                                                   | against Tulahuen C4 trypomastigotes of T.       |  | 2.98 μM | isolated from lianas from the Ancistrocladus genus | (Fernández <i>et al.</i> , 2021a). |

|    |                    |                                                 |                                                                                               |                                                  |                                                                                       |              |                                                    |                                    |
|----|--------------------|-------------------------------------------------|-----------------------------------------------------------------------------------------------|--------------------------------------------------|---------------------------------------------------------------------------------------|--------------|----------------------------------------------------|------------------------------------|
|    |                    |                                                 | )N(C)[C@@H]4C)=C(C=CC=C5OC)C5=C2O)C6=C(C7=C(O)C=C(OC)C8=C7C[C@@H](C)N(C)[C@@H]8C)C=CC(OC)=C61 | cruzi                                            |                                                                                       |              |                                                    |                                    |
| 18 | $\gamma$ -fagarine | C <sub>13</sub> H <sub>11</sub> NO <sub>3</sub> | COC1=CC=CC2=C1N=C1OC=CC1=C2OC                                                                 | against epimastigote sof the Y strain of T.cruzi | 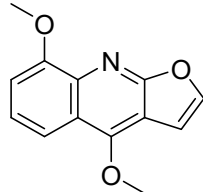   | 33.4 $\mu$ M | isolated from lianas from the Ancistrocladus genus | (Fernández <i>et al.</i> , 2021a). |
| 19 | Waltherione G      | C <sub>23</sub> H <sub>31</sub> NO <sub>3</sub> | CC1=C(C(=O)C2=C(N1OC)C3=CC=CC=C3)OC                                                           | against amastigotes (Tuluhaen C2C4 (LacZ))       |    | 0.02 $\mu$ M | aerial parts and roots of Waltheria indicas        | (Fernández <i>et al.</i> , 2021a). |
| 20 | Waltheriones H     | C <sub>24</sub> H <sub>33</sub> NO <sub>4</sub> | CC1=C(C(=O)C2=C(N1OC)C3=CC=CC=C3)OC                                                           | against amastigotes (Tuluhaen C2C4 (LacZ))       |   | 0.04 $\mu$ M | aerial parts and roots of Waltheria indicas        | (Fernández <i>et al.</i> , 2021a). |
| 21 | Waltheriones K     | C <sub>21</sub> H <sub>35</sub> NO <sub>4</sub> | CCCCCCCCC1CCC(C2=C1C(=O)C=C(N2O)C)OC                                                          | against amastigotes (Tuluhaen C2C4 (LacZ))       |  | 0.04 $\mu$ M | aerial parts and roots of Waltheria indicas        | (Fernández <i>et al.</i> , 2021a). |

|    |                               |                                                               |                                                                      |                                                        |                                                                                       |             |                                                           |                                       |
|----|-------------------------------|---------------------------------------------------------------|----------------------------------------------------------------------|--------------------------------------------------------|---------------------------------------------------------------------------------------|-------------|-----------------------------------------------------------|---------------------------------------|
| 22 | Antidesmone                   | C <sub>19</sub> H <sub>29</sub> NO <sub>3</sub>               | CCCCCCCCC1<br>CCC(=O)C2=C<br>1C(=O)C(=C(N<br>2)C)OC                  | against<br>amastigotes<br>(Tuluhaen<br>C2C4<br>(LacZ)) | 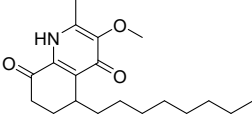   | 0.062<br>μM | aerial parts and<br>roots of <i>Waltheria<br/>indicas</i> | (Fernández <i>et al.</i> ,<br>2021a). |
| 23 | Waltherione C                 | C <sub>22</sub> H <sub>21</sub> NO <sub>3</sub>               | CC1=C(C(=O)<br>C2=C(N1)C=C<br>C3=C2C4CCC<br>C3(O4)C5=CC<br>=CC=C5)OC | against<br>amastigotes<br>(Tuluhaen<br>C2C4<br>(LacZ)) |    | 1.93 μM     | aerial parts and<br>roots of <i>Waltheria<br/>indicas</i> | (Fernández <i>et al.</i> ,<br>2021a). |
| 24 | 3-<br>hydroxyacetylindol<br>e | C <sub>10</sub> H <sub>9</sub> NO <sub>2</sub>                | C1=CC=C2C(=<br>C1)C(=CN2)C(<br>=O)CO                                 | amastigotes<br>(Tulahuén β-<br>gal)                    |    | 20.6 μM     | black coral<br><i>Antipathes</i> sp.                      | (Fernández <i>et al.</i> ,<br>2021a). |
| 25 | N-acetyl-β-<br>oxotryptamine  | C <sub>12</sub> H <sub>12</sub> N <sub>2</sub> O <sub>2</sub> | CC(=O)NCC(=<br>O)C1=CNC2=C<br>C=CC=C12                               | amastigotes<br>(Tulahuén β-<br>gal)                    |   | 19.4 μM     | black coral<br><i>Antipathes</i> sp.                      | (Fernández <i>et al.</i> ,<br>2021a). |
| 26 | 3-formylindole                | C <sub>9</sub> H <sub>7</sub> NO                              | C1=CC=C2C(=<br>C1)C(=CN2)C=<br>O                                     | amastigotes<br>(Tulahuén β-<br>gal)                    |  | 26.9 μM     | black coral<br><i>Antipathes</i> sp.                      | (Fernández <i>et al.</i> ,<br>2021a). |



|    |              |                                                 |                                                                                       |                                               |                                                                                       |          |                                                              |                                    |
|----|--------------|-------------------------------------------------|---------------------------------------------------------------------------------------|-----------------------------------------------|---------------------------------------------------------------------------------------|----------|--------------------------------------------------------------|------------------------------------|
| 27 | Flinderole C | C <sub>34</sub> H <sub>44</sub> N <sub>4</sub>  | <chem>CC(=CC1CC(N2C1=C(C3=CC=CC=C3)CCN(C)C)(C)C=CC4=C(C5=CC=C(C=C5N4)CCN(C)C)C</chem> | against <i>P. falciparum</i> FCR3 strain      | 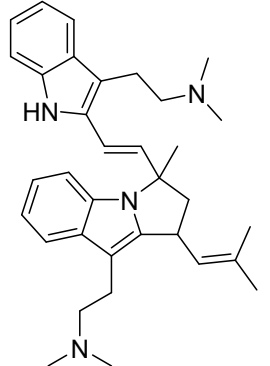   | 0.36 μM  | <i>F. amboinensis</i>                                        | (Fernández <i>et al.</i> , 2021b). |
| 28 | Annomontine  | C <sub>15</sub> H <sub>11</sub> N <sub>5</sub>  | <chem>C1=CC=C2C(=C1)C3=C(N2)C(=NC=C3)C4=NC(=NC=C4)N</chem>                            | trypomastigotes (Y strain) of <i>T. cruzi</i> |    | 16.08 μM | branches of <i>Annona foetida</i>                            | (Fernández <i>et al.</i> , 2021a). |
| 29 | Lycorine     | C <sub>16</sub> H <sub>17</sub> NO <sub>4</sub> | <chem>C1CN2CC3=C4C=C(C=C3C5C2C1=CC(C5O)O)OCO4</chem>                                  | anti- <i>T. cruzi</i> activity                |    | 0.70 μM  | isolated from extracts of different <i>Narcissus</i> species | (Fernández <i>et al.</i> , 2021a). |
| 30 | Narciclasine | C <sub>14</sub> H <sub>13</sub> NO <sub>7</sub> | <chem>C1OC2=C(O1)C(=C3C(=C2)C4=CC(C(C4N3=O)O)O)O</chem>                               | anti- <i>T. cruzi</i> activity                |   | 0.49 μM  | isolated from extracts of different <i>Narcissus</i> species | (Fernández <i>et al.</i> , 2021a). |
| 31 | Montanine    | C <sub>17</sub> H <sub>19</sub> NO <sub>4</sub> | <chem>COC1C=C2C(C1O)N3CC2C4=CC5=C(C=C4C3)OCO5</chem>                                  | anti- <i>T. cruzi</i> activity                |  | 1.99 μM  | isolated from extracts of different <i>Narcissus</i> species | (Fernández <i>et al.</i> , 2021a). |

|    |                    |                                                               |                                                                        |                                                          |                                                                                       |         |                                                       |                                    |
|----|--------------------|---------------------------------------------------------------|------------------------------------------------------------------------|----------------------------------------------------------|---------------------------------------------------------------------------------------|---------|-------------------------------------------------------|------------------------------------|
| 32 | Hippeastrine       | <u>C<sub>17</sub>H<sub>17</sub>NO<sub>5</sub></u>             | CN1CCC2=CC(C3C(C21)C4=C5=C(C=C4C(=O)O3)OCO5)O                          | anti-T. cruzi activity                                   | 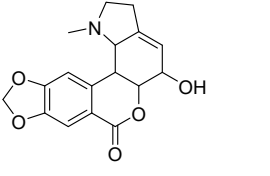   | 3.31 μM | isolated from extracts of different Narcissus species | (Fernández <i>et al.</i> , 2021a). |
| 33 | 3-O-acetylhamayne  | <u>C<sub>18</sub>H<sub>19</sub>NO<sub>5</sub></u>             | CC(=O)OC1CC2C3(C=C1)C(CN2CC4=CC5=C(C=C34)OCO5)O                        | against the amastigote form (Tulahuen β-gal C2C4 strain) |    | 25.2 μM | fresh bulbs of Crinum amabile                         | (Fernández <i>et al.</i> , 2021a). |
| 34 | Batzelladine F     | <u>C<sub>37</sub>H<sub>64</sub>N<sub>6</sub>O<sub>2</sub></u> | CCCCCCCCC1CC2CCC3N2C(=NC(C3C(=O)OC(C)CCCCC4CC5CCC6N5C(=N4)NC(C6)C)C)N1 | trypomastigotes(Ystrain) of T.cruzi                      |    | 5 μM    | marine sponge Monanchora arbuscula                    | (Fernández <i>et al.</i> , 2021a). |
| 35 | Batzelladine L     | <u>C<sub>39</sub>H<sub>68</sub>N<sub>6</sub>O<sub>2</sub></u> | CCCCCCCCC1CC2CCC3N2C(=NC(C3C(=O)OC(C)CCCCC4CC5CC6N5C(=N4)NC(C6)C)C)N1  | trypomastigotes(Ystrain) of T.cruzi                      |   | 2 μM    | marine sponge Monanchora arbuscula                    | (Fernández <i>et al.</i> , 2021a). |
| 36 | nor-batzelladine L | <u>C<sub>38</sub>H<sub>66</sub>N<sub>6</sub>O<sub>2</sub></u> | CCCCCCCCC1CC2CCC3N2C(=NC(C3C(=O)OC(C)CCCCC4CC5CCC                      | trypomastigotes(Ystrain) of T.cruzi                      |  | 7 μM    | marine sponge Monanchora arbuscula                    | (Fernández <i>et al.</i> , 2021a). |

|    |               |           |                                                                        |                                                          |                                                                                      |         |                                                 |                                    |
|----|---------------|-----------|------------------------------------------------------------------------|----------------------------------------------------------|--------------------------------------------------------------------------------------|---------|-------------------------------------------------|------------------------------------|
|    |               |           | 6N5C(=N4)NC(C6)C)N1                                                    |                                                          |                                                                                      |         |                                                 |                                    |
| 37 | Alternamide A | C12H13NO3 | <chem>O=C1CC2C3=CC(O)=C(O)C=C3C(CC2)N1</chem>                          | Against free trypomastigotes (Ystrain) of <i>T.cruzi</i> | 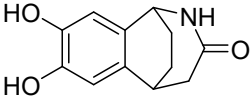  | 0.61 μM | aerial parts of <i>Alternanthera littoralis</i> | (Fernández <i>et al.</i> , 2021a). |
| 38 | Alternamide B | C9H9NO3   | <chem>O=C1CCC2=C(C(O)=C(O)C=C2)N1</chem>                               | Against free trypomastigotes (Ystrain) of <i>T.cruzi</i> |   | 10 μM   | aerial parts of <i>Alternanthera littoralis</i> | (Fernández <i>et al.</i> , 2021a). |
| 39 | Alternamine A | C15H15NO4 | <chem>OC1=C(O)C=C([C@](C2=CC(O)=C(O)C=C2)([H])NCC3)C3=C1</chem>        | Against free trypomastigotes (Ystrain) of <i>T.cruzi</i> |   | 0.23 μM | aerial parts of <i>Alternanthera littoralis</i> | (Fernández <i>et al.</i> , 2021a). |
| 40 | Alternamine B | C14H21NO7 | <chem>OC1=CC(CCN[C@@H]2O[C@@H](CO)[C@@H](O)C(O)[C@@H]2O)=CC=C1O</chem> | Against free trypomastigotes (Ystrain) of <i>T.cruzi</i> |  | 0.82 μM | aerial parts of <i>Alternanthera littoralis</i> | (Fernández <i>et al.</i> , 2021a). |

|    |                          |                                                    |                                                                                                                                                       |                                                                      |                                                                                       |             |                                                 |                                       |
|----|--------------------------|----------------------------------------------------|-------------------------------------------------------------------------------------------------------------------------------------------------------|----------------------------------------------------------------------|---------------------------------------------------------------------------------------|-------------|-------------------------------------------------|---------------------------------------|
| 41 | Polyalthenol             | <u>C<sub>23</sub>H<sub>31</sub>NO</u>              | CC1CCC2C(=C<br>CC(C2(C)C)O)<br>C1(C)CC3=CN<br>C4=CC=CC=C<br>43                                                                                        | against<br>trypomastig<br>otes<br>(Tulahuen<br>strain) of<br>T.cruzi | 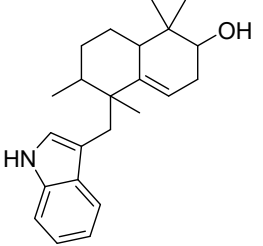   | 8.4 μM      | Root bark of<br>Greenwayodendr<br>on suaveolens | (Fernández <i>et al.</i> ,<br>2021a). |
| 42 | N-acetyl-<br>polyveoline | C <sub>26</sub> H <sub>37</sub> NO                 | CC1(C)[C@@<br>H](C)CC[C@@<br>]2(C)C1CC[C@<br>]3(C)C2CC4C3<br>C(C=CC=C5)=<br>C5N4C(C)=O                                                                | against<br>trypomastig<br>otes<br>(Tulahuen<br>strain)               |    | 8.4 μM      | Root bark of<br>Greenwayodendr<br>on suaveolens | (Fernández <i>et al.</i> ,<br>2021a). |
| 43 | Solamargine              | <u>C<sub>45</sub>H<sub>73</sub>NO<sub>15</sub></u> | CC1CCC2(C(C<br>3C(O2)CC4C3(<br>CCC5C4CC=C<br>6C5(CCC(C6)O<br>C7C(C(C(C(O7<br>)CO)OC8C(C(C<br>(C(O8)C)O)O<br>O)O)OC9C(C(<br>C(C(O9)C)O)O<br>)O)C)C)NC1 | against<br>epimastigote<br>s of the Y<br>strain of<br>T.cruzi        |    | 17.63μ<br>M | isolated from<br>Solanum<br>palinacanthum       | (Fernández <i>et al.</i> ,<br>2021a). |
| 44 | Ilicifoliunines A        | C <sub>41</sub> H <sub>47</sub> NO <sub>17</sub>   | CC1C(C(=O)O<br>C2C(C(C3(C(C<br>(C4C(C3(C2(C<br>O)OC4(COC(=<br>O)C5=C1N=CC<br>=C5)C)O)OC(=<br>O)C6=CC=CC=<br>C6)OC(=O)C)C<br>OC(=O)C)OC(               | against the<br>epimastigote<br>s (Y strain)<br>of T.cruzi            |  | 27.7 μM     | root bark of<br>Maytenus<br>ilicifolia          | (Fernández <i>et al.</i> ,<br>2021a). |

|    |                   |                       |                                                                                                                                                                                                      |                                                    |                                                                                       |              |                                                             |                                    |
|----|-------------------|-----------------------|------------------------------------------------------------------------------------------------------------------------------------------------------------------------------------------------------|----------------------------------------------------|---------------------------------------------------------------------------------------|--------------|-------------------------------------------------------------|------------------------------------|
|    |                   |                       | <chem>=O)C)OC(=O)C)C</chem>                                                                                                                                                                          |                                                    |                                                                                       |              |                                                             |                                    |
| 45 | Aquifoliunine E-I | $C_{43}H_{49}NO_{18}$ | <chem>C[C@@H]1[C@@H](C)C(=O)O[C@@H]2[C@@H](OC(C)=O)[C@H](OC(C)=O)[C@@]3(COC(C)=O)[C@@H](OC(C)=O)[C@@H](OC(C)=O)C4=CC=CC=C4)[C@H]4[C@H](OC(C)=O)[C@@]3(O[C@]4(C)COC(=O)C3=C1N=CC=C3)[C@@]2(C)O</chem> | against the epimastigotes (Y strain) of T.cruzi    | 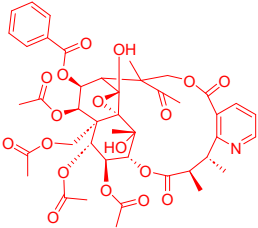   | 41.9 $\mu$ M | root bark of <i>Maytenus ilicifolia</i>                     | (Fernández <i>et al.</i> , 2021a). |
| 46 | Monalidine A      | $C_{16}H_{27}N_3$     | <chem>CCCCCCCCC1=NC(=N)N2CCCC2=C1</chem>                                                                                                                                                             | against free trypomastigotes (Y strain) of T.cruzi |   | 8 $\mu$ M    | isolated from the marine sponge <i>Monanchora arbuscula</i> | (Fernández <i>et al.</i> , 2021a). |
| 47 | Catharoseumine    | $C_{21}H_{22}N_2O_4$  | <chem>CC1C23CC(=C4C5(C2(N(CC5)CC=C3)OO1)C6=CC=CC=C6N4)C(=O)OC</chem>                                                                                                                                 | against protozoan parasite falcipain-2             |  | 4.06 $\mu$ M | whole plant of <i>C. roseus</i>                             | (Almagro <i>et al.</i> , 2015).    |

|    |                    |                          |                                                                                                                                    |                                  |                                                                                      |               |                                                           |                                   |
|----|--------------------|--------------------------|------------------------------------------------------------------------------------------------------------------------------------|----------------------------------|--------------------------------------------------------------------------------------|---------------|-----------------------------------------------------------|-----------------------------------|
| 48 | Vinblastine        | $C_{46}H_{58}N_4O_9$     | <chem>CCC1(CC2CC(C3=C(CCN(C2)C1)C4=CC=CC=C4N3)(C5=C(C=C6C(=C5)C78CCN9C7C(C=CC9)(C(C(C8N6C)(C(=O)OC)O)OC(=O)C)C)OC)C(=O)OC)O</chem> | against Trypanosoma cruzi        | 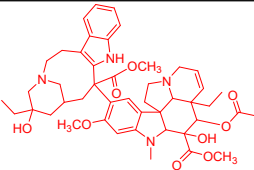  | 15 $\mu$ M    | whole plant of <i>C. roseus</i>                           | (Dey <i>et al.</i> , 2020).       |
| 49 | ancistrobenomine A | $C_{25}H_{25}NO_5$       | <chem>COC1=CC=CC2=C(C(C)=CC(O)=C12)C1=C2C=C(CO)N=C(C)C2=C(OC)C=C1OC</chem>                                                         | against T. cruzi                 |   | 11.45 $\mu$ M | isolated from lianas from the <i>Ancistrocladus</i> genus | (Dey <i>et al.</i> , 2020).       |
| 50 | Isoborreverine     | $C_{32}H_{40}N_4$        | <chem>CC1=CC2C(C(N3C2=C(C4=C(C=CC=C43)CCNC)C5=C(C6=CC=CC=C6N5)CCNC)C(C1)(C)C</chem>                                                | against P. falciparum 3D7 strain |  | 0.24 $\mu$ M  | Australian species <i>Flindersia acuminata</i>            | (Fernandez <i>et al.</i> , 2010). |
| 51 | psammaplysin F     | $C_{22}H_{25}Br_4N_3O_5$ | <chem>CNCCC1=CC(=C(C(=C1)Br)OCCCNC(=O)</chem>                                                                                      | against T. cruzi                 |                                                                                      | 5.6 $\mu$ M   | <i>Hyatella</i> sp.                                       | (Tempone <i>et al.</i> , 2021).   |

|    |                 |                                                                                              |                                                                                                                |                                           |                                                                                       |                        |                                           |                                 |
|----|-----------------|----------------------------------------------------------------------------------------------|----------------------------------------------------------------------------------------------------------------|-------------------------------------------|---------------------------------------------------------------------------------------|------------------------|-------------------------------------------|---------------------------------|
|    |                 |                                                                                              | <chem>C2=NOC3(C2)CC(=C(C(=CO3)Br)OC)Br)Br</chem>                                                               |                                           | 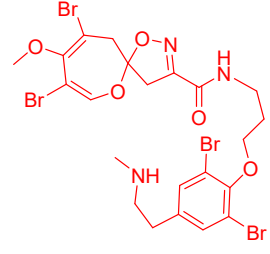   |                        |                                           |                                 |
| 52 | Psammalyisin H  | C <sub>26</sub> H <sub>30</sub> Br <sub>4</sub> F <sub>3</sub> N <sub>3</sub> O <sub>8</sub> | <chem>C[N+](C)(C)CC1=CC(=C(C(=C1)Br)OCCCN(C(=O)C2=NOC3(C2O)C=C(C(C(=CO3)Br)OC)Br)Br.C(=O)(C(F)(F)F)[O-]</chem> | against the P. falciparum strain 3D7      |    | 0.4 μM                 | Pseudoceratina sp.                        | (Tempone <i>et al.</i> , 2021). |
| 53 | psammalyisins G | C <sub>23</sub> H <sub>26</sub> Br <sub>4</sub> N <sub>4</sub> O <sub>7</sub>                | <chem>CN(CCC1=CC(=C(C(=C1)Br)OCCCN(C(=O)C2=NOC3(C2O)C=C(C(C(=CO3)Br)OC)Br)Br)C(=O)N</chem>                     | against the P. falciparum strain 3D7      |   | 5.2 μM                 | Pseudoceratina sp.                        | (Tempone <i>et al.</i> , 2021). |
| 54 | Palauamine      | C <sub>17</sub> H <sub>22</sub> ClN <sub>9</sub> O <sub>2</sub>                              | <chem>C1C2C(C(C3(C2C45N1C(=O)C6=CC=CN6C4N=C(N5)N)C(N=C(N3)N)O)C1)CN</chem>                                     | against T. b. rhodesiense and L. donovani |  | 0.4 μg/mL<br>1.1 μg/mL | sponges of the Agelas and Axinella genera | (Tempone <i>et al.</i> , 2021). |

|    |                |                                                                             |                                                  |                                                                     |                                                                                       |                        |                                           |                                 |
|----|----------------|-----------------------------------------------------------------------------|--------------------------------------------------|---------------------------------------------------------------------|---------------------------------------------------------------------------------------|------------------------|-------------------------------------------|---------------------------------|
| 55 | longamide B    | C <sub>9</sub> H <sub>8</sub> Br <sub>2</sub> N <sub>2</sub> O <sub>3</sub> | C1C(N2C(=CC(=C2Br)Br)C(=O)N1)CC(=O)O             | against T. b. rhodesiense and L. donovani                           | 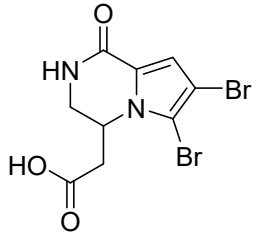   | 1.5 µg/mL<br>3.8 µg/mL | sponges of the Agelas and Axinella genera | (Tempone <i>et al.</i> , 2021). |
| 56 | dispacamide B  | C <sub>11</sub> H <sub>12</sub> BrN <sub>5</sub> O <sub>2</sub>             | C1=C(NC=C1Br)C(=O)NCCC=C2C(=O)NC(=N2)N           | against P. falciparum                                               |    | 1.3 µM                 | sponges of the Agelas and Axinella genera | (Tempone <i>et al.</i> , 2021). |
| 57 | spongiacidin B | C <sub>11</sub> H <sub>12</sub> BrN <sub>5</sub> O <sub>2</sub>             | C1CNC(=O)C2=C(C1=C3C(=O)NC(N3)N)C(=CN2)Br        | against P. falciparum                                               |    | 1.1 µM                 | sponges of the Agelas and Axinella genera | (Tempone <i>et al.</i> , 2021). |
| 58 | Oroidin        | C <sub>11</sub> H <sub>11</sub> Br <sub>2</sub> N <sub>5</sub> O            | C1=C(NC(=C1Br)Br)C(=O)NCC=CC2=CN=C(N2)N          | inhibition of the P. falciparum enoyl-ACP reductase (PfFabI) enzyme |   | 0.77 µM                | sponges of the Agelas and Axinella genera | (Tempone <i>et al.</i> , 2021). |
| 59 | Fascaplysin    | C <sub>18</sub> H <sub>11</sub> ClN <sub>2</sub> O                          | C1=CC=C2C(=C1)C3=C(N2)C4=[N+](C=C3)C5=CC=CC=C5N4 | against T. b. rhodesiense                                           |  | 0.17 µg/mL             | sponge Hyrtios cf. erecta                 | (Tempone <i>et al.</i> , 2021). |



|    |                |                                                               |                                                                                                   |                                                                                  |                                                                                     |                 |                                                         |                                 |
|----|----------------|---------------------------------------------------------------|---------------------------------------------------------------------------------------------------|----------------------------------------------------------------------------------|-------------------------------------------------------------------------------------|-----------------|---------------------------------------------------------|---------------------------------|
| 60 | Staurosporine  | C <sub>28</sub> H <sub>26</sub> N <sub>4</sub> O <sub>3</sub> | 5C4=O.[C1-]<br><chem>CC12C(C(CC(O1)N3C4=CC=CC=C4C5=C6C(=C7C8=CC=CC=C8N2C7=C53)CNC6=O)NC)OC</chem> | against L. major promastigotes, against T. b. brucei                             | 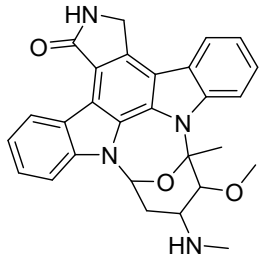 | 5.3 μM<br>20 nM | sponge associated actinomycetes <i>Streptomyces</i> sp. | (Tempone <i>et al.</i> , 2021). |
| 61 | Tryptophol     | C <sub>10</sub> H <sub>11</sub> NO                            | <chem>C1=CC=C2C(=C1)C(=CN2)CCO</chem>                                                             | against L. donovani amastigotes                                                  |  | 9.6 μg/mL       | <i>Spongia</i> sp.,<br><i>Ircinia</i> sp.               | (Tempone <i>et al.</i> , 2021). |
| 62 | Diazepinomicin | C <sub>28</sub> H <sub>34</sub> N <sub>2</sub> O <sub>4</sub> | <chem>CC(=CCCC(=CCCC(=CCN1C2=C(C(=CC(=C2)O)O)NC3=C(C1=O)C=CC=C3O)C)C</chem>                       | against T. b. brucei trypomastigotes inhibit the T. b. brucei protease rhodesain |  | 13.6 μM         | <i>Micromonospora</i> sp.                               | (Tempone <i>et al.</i> , 2021). |

|    |                     |              |                                                                                                            |                                                                                          |                                                                                       |                   |                              |                                 |
|----|---------------------|--------------|------------------------------------------------------------------------------------------------------------|------------------------------------------------------------------------------------------|---------------------------------------------------------------------------------------|-------------------|------------------------------|---------------------------------|
| 63 | paenidigyamycin A   | C36H52N4+2   | <chem>CC1=C([N+](=C(N1CCCC2=CC=CC=C2)C3=[N+](C(=C(N3C)CC4=CC=CC=C4)C)CCC(C)C)CCC(C)C)C</chem>              | Against (T. b. brucei trypomastigotes<br>Against P. falciparum                           | 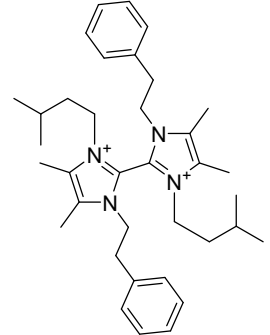   | 0.78 μM<br>9.1 μM | mangrove rhizosphere soils   | (Tempone <i>et al.</i> , 2021). |
| 64 | Ptilomycalin A      | C45H83ClN6O5 | <chem>CCC1CCCCC2(O1)CC3CCC4[N+]3=C(N2)NC5(C4C(=O)O)CCCCCCCCCCCCCCCC(=O)N(CCCCN)CCCN)CCCC(O5)C.[Cl-]</chem> | against P. falciparum                                                                    |    | 0.1 μM            | sponge Monanchora arbuscula  | (Tempone <i>et al.</i> , 2021). |
| 65 | 2-n-propylquinoline | C12H13N      | <chem>CCCC1=NC2=CC=CC=C2C=C1</chem>                                                                        | against the promastigote forms of L. braziliensis and the epimastigote forms of T. cruzi |    | 0.29 mM           | Galipea longiflora K. Krause | (Osorio <i>et al.</i> , 2008).  |
| 66 | Galipinine          | C19H21NO2    | <chem>CN1C(CCC2=C(C=CC=C2)CC)C3=CC4=C(C=C3)OCO4</chem>                                                     | Against chloroquine-resistant strains of P.                                              |  | 6.12 μM           | Galipea officinalis Hancock  | (Osorio <i>et al.</i> , 2008).  |

|    |                 |                                                               |                                                            |                                                                                                         |                                                                                       |         |                     |                                |
|----|-----------------|---------------------------------------------------------------|------------------------------------------------------------|---------------------------------------------------------------------------------------------------------|---------------------------------------------------------------------------------------|---------|---------------------|--------------------------------|
|    |                 |                                                               |                                                            | falciparum                                                                                              |                                                                                       |         |                     |                                |
| 67 | Normelicopicine | C <sub>17</sub> H <sub>17</sub> N <sub>1</sub> O <sub>5</sub> | <chem>CN1C2=CC=C(C=C2C(=O)C3=C1C(=C(C(=C3O)OC)OC)OC</chem> | against both chloroquine-sensitive (HB3) and chloroquine-resistant (K1) strains of <i>P. falciparum</i> | 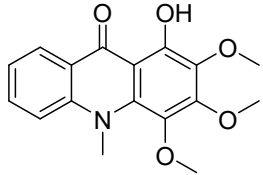   | 14.7 μM | Teclea trichocarpas | (Osorio <i>et al.</i> , 2008). |
| 68 | Quinine         | C <sub>20</sub> H <sub>24</sub> N <sub>2</sub> O <sub>2</sub> | <chem>COC1=CC2=C(C=CN=C2C=C1)C(C3CC4CCN3CC4C=C)O</chem>    | Against <i>T. b. brucei</i>                                                                             |    | 4.9 μM  | cinchona bark       | (Osorio <i>et al.</i> , 2008). |
| 69 | Quinidine       | C <sub>20</sub> H <sub>24</sub> N <sub>2</sub> O <sub>2</sub> | <chem>COC1=CC2=C(C=CN=C2C=C1)C(C3CC4CCN3CC4C=C)O</chem>    | Against <i>T. b. brucei</i>                                                                             |   | 0.8 μM  | cinchona bark       | (Osorio <i>et al.</i> , 2008). |
| 70 | Cinchonine      | C <sub>19</sub> H <sub>22</sub> N <sub>2</sub> O              | <chem>C=CC1CN2CC1CC2C(C3=C(C=NC4=CC=C(C=C4)O</chem>        | Against <i>T. b. brucei</i>                                                                             |  | 1.2 μM  | cinchona bark       | (Osorio <i>et al.</i> , 2008). |

|    |                    |           |                                                                   |                                                                  |                                                                                       |         |                                |                                |
|----|--------------------|-----------|-------------------------------------------------------------------|------------------------------------------------------------------|---------------------------------------------------------------------------------------|---------|--------------------------------|--------------------------------|
| 71 | Crotsparine        | C18H19NO3 | <chem>CN1CCC2=CC(=C(C3=C2C1C34C=CC(=O)C=C4)O)OC</chem>            | against the chloroquine-resistant FcB1 strain                    | 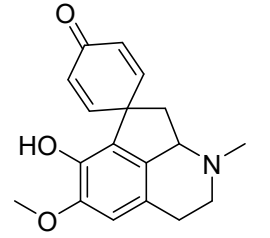   | 7.41 μM | Uvaria klaineana               | (Osorio <i>et al.</i> , 2008). |
| 72 | isoguattouregidine | C19H19NO5 | <chem>CC1(C2=C(C=CC(=C2)O)C3=C(C(=C(C4=C3C1=NCC4)OC)O)OC)O</chem> | against the promastigote forms of L. donovani and L. amazonensis |    | 0.29 mM | genus Guatteria                | (Osorio <i>et al.</i> , 2008). |
| 73 | Liriodenine        | C17H9NO3  | <chem>C1OC2=C(O1)C3=C4C(=C2)C=CN=C4C(=O)C5=CC=CC=C53</chem>       | Against P. falciparum                                            |    | 26.2 μM | Stephania dinklagei            | (Osorio <i>et al.</i> , 2008). |
| 74 | Stephanine         | C19H19NO3 | <chem>CN1CCC2=CC3=C(C4=C2C1CC5=C4C=CC=C5OC)OCO3</chem>            | against the T9/94 strain of P. falciparum                        |   | 0.38 μM | Stephania venosa               | (Osorio <i>et al.</i> , 2008). |
| 75 | Atherosperminine   | C20H23NO2 | <chem>CN(C)CCC1=C(C(=C(C2=C1C=CC3=CC=CC=C32)OC)OC</chem>          | against a chloroquine-resistant strain of P. falciparum          |  | 5.80 μM | stem bark of Cryptocarya nigra | (Uzor, 2020b).                 |

|    |                           |                                                              |                                                                    |                                                                                           |                                                                                       |             |                                                                |                |
|----|---------------------------|--------------------------------------------------------------|--------------------------------------------------------------------|-------------------------------------------------------------------------------------------|---------------------------------------------------------------------------------------|-------------|----------------------------------------------------------------|----------------|
| 76 | (+)-N-methylisococlaurine | C <sub>18</sub> H <sub>21</sub> NO <sub>3</sub>              | <chem>CN1CCC2=CC(=C(C=C2C1CC3=CC=C(C=C3)O)OC)O</chem>              | (K1 strain)<br>against a chloroquine-resistant strain of <i>P. falciparum</i> (K1 strain) | 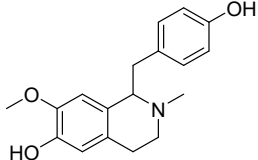   | 5.40 μM     | stem bark of <i>Cryptocarya nigra</i>                          | (Uzor, 2020b). |
| 77 | Palmatine                 | C <sub>21</sub> H <sub>22</sub> NO <sub>4</sub> <sup>+</sup> | <chem>COC1=C(C2=C[N+]3=C(C=C2C=C1)C4=CC(=C(C=C4CC3)OC)OC)OC</chem> | against <i>P. falciparum</i> K1 strain                                                    |    | 0.080 μg/mL | leaves of <i>Annickia kummeriae</i>                            | (Uzor, 2020b). |
| 78 | Dihydroneitidine          | C <sub>21</sub> H <sub>19</sub> NO <sub>4</sub>              | <chem>CN1CC2=CC(=C(C=C2C3=C1C4=CC5=C(C=C4C=C3)OCO5)OC)OC</chem>    | antiparasitic activity                                                                    |    | 25 nM       | <i>Zanthoxylum heitzii</i> (Rutaceae) bark                     | (Uzor, 2020b). |
| 79 | Pellitorine               | C <sub>14</sub> H <sub>25</sub> NO                           | <chem>CCCCC=CC=CC(=O)NCC(C)C</chem>                                | antiparasitic activity                                                                    |    | 9.7 μM      | <i>Zanthoxylum heitzii</i> (Rutaceae) bark                     | (Uzor, 2020b). |
| 80 | Roemerine                 | C <sub>18</sub> H <sub>17</sub> NO <sub>2</sub>              | <chem>CN1CCC2=CC3=C(C4=C2C1CC5=CC=CC=C54)OCO3</chem>               | inhibitory activity against the growth of <i>P. falciparum</i> 3D7 clone                  |  | 1.49 μg/mL  | leaves of <i>Phoebe tavoyana</i> (Meissn.) Hook f. (Lauraceae) | (Uzor, 2020b). |

|    |               |                                                              |                                                                               |                                                                          |                                                                                       |            |                                                                |                 |
|----|---------------|--------------------------------------------------------------|-------------------------------------------------------------------------------|--------------------------------------------------------------------------|---------------------------------------------------------------------------------------|------------|----------------------------------------------------------------|-----------------|
| 81 | Lauro litsine | C <sub>18</sub> H <sub>19</sub> NO <sub>4</sub>              | <chem>COC1=C(C=C2CC3C4=C(C2=C1)C(=C(C=C4CCN3)O)OC)O</chem>                    | inhibitory activity against the growth of <i>P. falciparum</i> 3D7 clone | 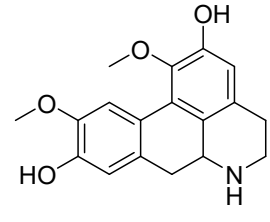   | 1.65 µg/mL | leaves of <i>Phoebe tavoyana</i> (Meissn.) Hook f. (Lauraceae) | (Uzor, 2020b).  |
| 82 | boldine       | C <sub>19</sub> H <sub>21</sub> NO <sub>4</sub>              | <chem>CN1CCC2=CC(=C(C3=C2C1C4=CC(=C(C=C43)OC)O)OC)O</chem>                    | inhibitory activity against the growth of <i>P. falciparum</i> 3D7 clone |    | 2.76 µg/ml | leaves of <i>Phoebe tavoyana</i> (Meissn.) Hook f. (Lauraceae) | (Uzor, 2020b).a |
| 83 | Sebiferine    | C <sub>20</sub> H <sub>23</sub> NO <sub>4</sub>              | <chem>CN1CCC23C=C(C(=O)C=C2C1CC4=CC(=C(C=C34)OC)O)C)OC</chem>                 | against <i>P. falciparum</i> KI strain                                   |    | 22.46 µM   | <i>Dehaasia longipedicellata</i>                               | (Uzor, 2020b).  |
| 84 | Coptisine     | C <sub>19</sub> H <sub>14</sub> NO <sub>4</sub> <sup>+</sup> | <chem>C1C[N+]2=C(C=C3C=CC4=C(C3=C2)OCO4)C5=CC6=C(C=C5)OCO6</chem>             | inhibitor of <i>Plasmodium falciparum</i> dihydroorotate dehydrogenase   |   | 1.83 µM    | <i>Coptidis rhizoma</i>                                        | (Uzor, 2020b).  |
| 85 | cripowellin A | C <sub>25</sub> H <sub>31</sub> NO <sub>12</sub>             | <chem>COC1C(OC(C2C1OCOCO2)OC3CC(=O)C4CN(CC5=CC6=C(C=C5)OCO6)C(=C45)OCO</chem> | antiplasmodial activity                                                  |  | 30 nM      | swamp lily <i>Crinum erubescens</i>                            | (Uzor, 2020b).  |

|    |                 |            |                                                                          |                                                               |                                                                                       |            |                                           |                |
|----|-----------------|------------|--------------------------------------------------------------------------|---------------------------------------------------------------|---------------------------------------------------------------------------------------|------------|-------------------------------------------|----------------|
|    |                 |            | 6)C(=O)C3O)C<br>O                                                        |                                                               |                                                                                       |            |                                           |                |
| 86 | Cripowellin C   | C25H31NO11 | CC1C(C2C(C(O1)OC3CC(=O)C4CCN(CC5=CC6=C(C=C45)OCO6)C(=O)C3O)OCOCO2)O<br>C | antiplasmodial activity                                       | 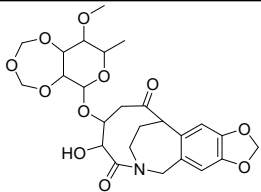   | 26 nM      | swamp lily<br><i>Crinum erubescens</i>    | (Uzor, 2020b). |
| 87 | Sauristolactam  | C17H13NO3  | CN1C2=CC3=CC=CC=C3C4=C2C(=CC(=C4)OC)O)C1=O                               | Against a chloroquine-sensitive <i>P.falciparum</i> line(3D7) |    | 9.0 μM     | aerial parts of <i>Goniolium australe</i> | (Uzor, 2020b). |
| 88 | (-)-anonaine    | C17H15NO2  | C1CNC2CC3=CC=CC=C3C4=C2C1=CC5=C4OCOC5                                    | Against a chloroquine-sensitive <i>P.falciparum</i> line 3D7  |    | 7.0 μM     | aerial parts of <i>Goniolium australe</i> | (Uzor, 2020b). |
| 89 | Normelicopidine | C16H13NO5  | CN1C2=CC=C(C=C2C(=O)C3=C1C(=C4C(=C3O)OCO4)OC                             | parasite <i>P. falciparum</i> Dd <sub>2</sub>                 |  | 18.9 ug/mL | root bark of <i>Zanthoxylum simullans</i> | (Uzor, 2020b). |

|    |                          |            |                                                                                                       |                                                                           |                                                                                       |                                                |                                                                                 |                |
|----|--------------------------|------------|-------------------------------------------------------------------------------------------------------|---------------------------------------------------------------------------|---------------------------------------------------------------------------------------|------------------------------------------------|---------------------------------------------------------------------------------|----------------|
| 90 | Carpaine                 | C28H50N2O4 | <chem>CC1C2CCC(N1)CCCCCCC(=O)OC3CCC(CC(C)CCCC(=O)O2)NC3C</chem>                                       | strains of <i>P. falciparum</i> 3D7                                       | 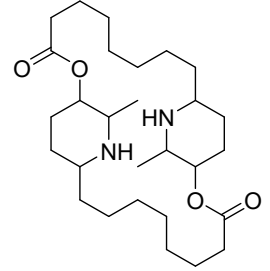   | 4.21 $\mu\text{M}$                             | <i>Carica papaya</i> L                                                          | (Uzor, 2020b). |
| 91 | hymenocardine-H          | C34H51N7O6 | <chem>CCC(C)C(C(=O)NC1C(OC2=C(C=C(C=C2)C(=O)CNC(=O)C(NC1=O)CC3=CN=CN3)C(C)C)NC(=O)C(C)CC)N(C)C</chem> | antiplasmodial activity                                                   |    | 27.9 $\mu\text{M}$                             | root bark of <i>Hymenocardia</i>                                                | (Uzor, 2020b). |
| 92 | O-desmethylnummularine-R | C32H39N5O5 | <chem>CCC(C)C1C(=O)NC=CC2=C(C=CC(=C2)OC3CCN(C3C(=O)N1)C(=O)C(C4=CNC5=CC=CC=C54)N(C)C)O</chem>         | antiplasmodial activity against <i>P. falciparum</i> K1                   |    | 3.2 $\mu\text{M}$                              | Roots of <i>Ziziphus oxyphylla</i>                                              | (Uzor, 2020b). |
| 93 | simplicifolianine        | C21H18NO6+ | <chem>COC1=C2C(=CC3=C1OC(=O)C[N+]4=CC5=CC6=C(C(=C5)C=C24)CO)OC(=O)O6</chem>                           | antiplasmodial activity against the <i>P. falciparum</i> strains, TM4/8.2 |  | 0.78 $\mu\text{g/mL}$<br>1.29 $\mu\text{g/mL}$ | aerial parts of <i>Meconopsis simplicifolia</i> (D. Don) Walpers (Papaveraceae) | (Uzor, 2020b). |



|    |                       |           |                                                             |                                                                                  |                                                                                      |                 |                              |                              |
|----|-----------------------|-----------|-------------------------------------------------------------|----------------------------------------------------------------------------------|--------------------------------------------------------------------------------------|-----------------|------------------------------|------------------------------|
|    |                       |           |                                                             | (chloroquine-antifolate-sensitive strain) and K1CB1 (multidrug-resistant strain) |                                                                                      |                 |                              |                              |
| 94 | (+)-laurotetanine     | C19H21NO4 | <chem>COC1=C(C2=C3C(CC4=CC(=C(C=C42)OC)O)NCCC3=C1)OC</chem> | Antiplasmodial activity                                                          | 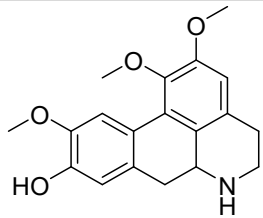  | 0.189 $\mu$ M   | <i>Alseodaphne corneri</i> . | (Uzor, 2020b).               |
| 95 | Sternbergine          | C18H21NO5 | <chem>CC(=O)OC1C(C=C2CCN3C2C1C4=CC(=C(C=C4C3)O)OC)O</chem>  | Against <i>P. falciparum</i> strain D10                                          |   | 3.9 $\mu$ g/mL  | <i>B. radulosa</i>           | (Nair and van Staden, 2019). |
| 96 | 1-O-Acetylnorpluviine | C18H21NO4 | <chem>CC(=O)OC1CC=C2CCN3C2C1C4=CC(=C(C=C4C3)O)OC</chem>     | Against <i>P. falciparum</i> strain D10                                          |  | 28.3 $\mu$ g/mL | <i>B. radulosa</i>           | (Nair and van Staden, 2019). |

|     |                |                                                              |                                                           |                                  |                                                                                      |             |                    |                              |
|-----|----------------|--------------------------------------------------------------|-----------------------------------------------------------|----------------------------------|--------------------------------------------------------------------------------------|-------------|--------------------|------------------------------|
| 97  | Acetylcaranine | C <sub>18</sub> H <sub>19</sub> NO <sub>4</sub>              | <chem>CC(=O)OC1CC=C2CCN3C2C1C4=CC5=C(C=C4C3)OCO5</chem>   | Against P. falciparum strain Dd2 | 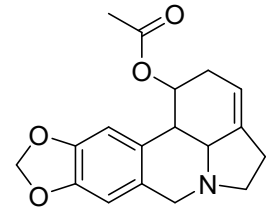  | 1.1 µg/mL   | A. belladonna      | (Nair and van Staden, 2019). |
| 98  | Ungeremine     | C <sub>16</sub> H <sub>12</sub> NO <sub>3</sub> <sup>+</sup> | <chem>C1C[N+]2=CC3=CC4=C(C=C3C5=CC(=CC1=C52)O)OCO4</chem> | Against P. falciparum strain K1  |   | 0.088 µg/mL | Phaedranassa dubia | (Nair and van Staden, 2019). |
| 99  | Pseudolycorine | C <sub>16</sub> H <sub>19</sub> NO <sub>4</sub>              | <chem>COC1=C(C=C2C3C(C(C=C4C3N(CC4)CC2=C1)O)O)O</chem>    | Against P. falciparum strain K1  |   | 0.24 µg/mL  | P. dubia           | (Nair and van Staden, 2019). |
| 100 | Galanthine     | C <sub>18</sub> H <sub>23</sub> NO <sub>4</sub>              | <chem>COC1C=C2CCN3C2C(C1O)C4=CC(=C(C=C4C3)OC)OC</chem>    | Against P. falciparum strain K1  |  | 0.2 µg/mL   | Z. citrina         | (Nair and van Staden, 2019). |

Table S-2: Visualization of Contour Maps from the Field-Based QSAR Study.

| Compound | Gaussian | Gaussian | Gaussian | Gaussian | Gaussian |
|----------|----------|----------|----------|----------|----------|
|----------|----------|----------|----------|----------|----------|

|                           | H-bond acceptor                                                                    | H-bond donor                                                                        | Hydrophobic                                                                          | Steric                                                                               | Electrostatic                                                                        |
|---------------------------|------------------------------------------------------------------------------------|-------------------------------------------------------------------------------------|--------------------------------------------------------------------------------------|--------------------------------------------------------------------------------------|--------------------------------------------------------------------------------------|
| (+)-N-methylisococlaurine |   |   |   |   |   |
| Boldine                   |   |   |   |   |   |
| Carpaine                  |  |  |  |  |  |

|                       |                                                                                    |                                                                                     |                                                                                      |                                                                                      |                                                                                       |
|-----------------------|------------------------------------------------------------------------------------|-------------------------------------------------------------------------------------|--------------------------------------------------------------------------------------|--------------------------------------------------------------------------------------|---------------------------------------------------------------------------------------|
| diazepinomicin        | 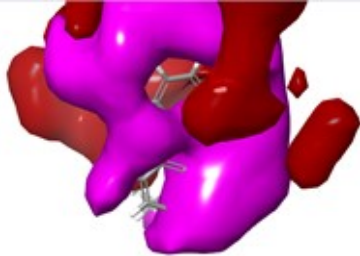  |   |   |   |    |
| hymenocardine-H       |   |   |   |   |    |
| longamide B           |  |  |  |  |   |
| O-desmethylnumarine-R |                                                                                    |                                                                                     |                                                                                      |                                                                                      |  |

|                 |                                                                                    |                                                                                     |                                                                                      |                                                                                      |                                                                                      |
|-----------------|------------------------------------------------------------------------------------|-------------------------------------------------------------------------------------|--------------------------------------------------------------------------------------|--------------------------------------------------------------------------------------|--------------------------------------------------------------------------------------|
|                 | 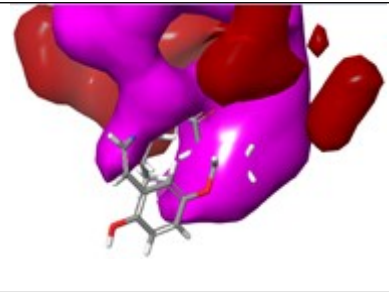  |   |   |   |                                                                                      |
| paenidigyamin A |   |   |   |   |   |
| Palauamine      |  |  |  |  |  |
| spongiacidin B  |                                                                                    |                                                                                     |                                                                                      |                                                                                      |                                                                                      |

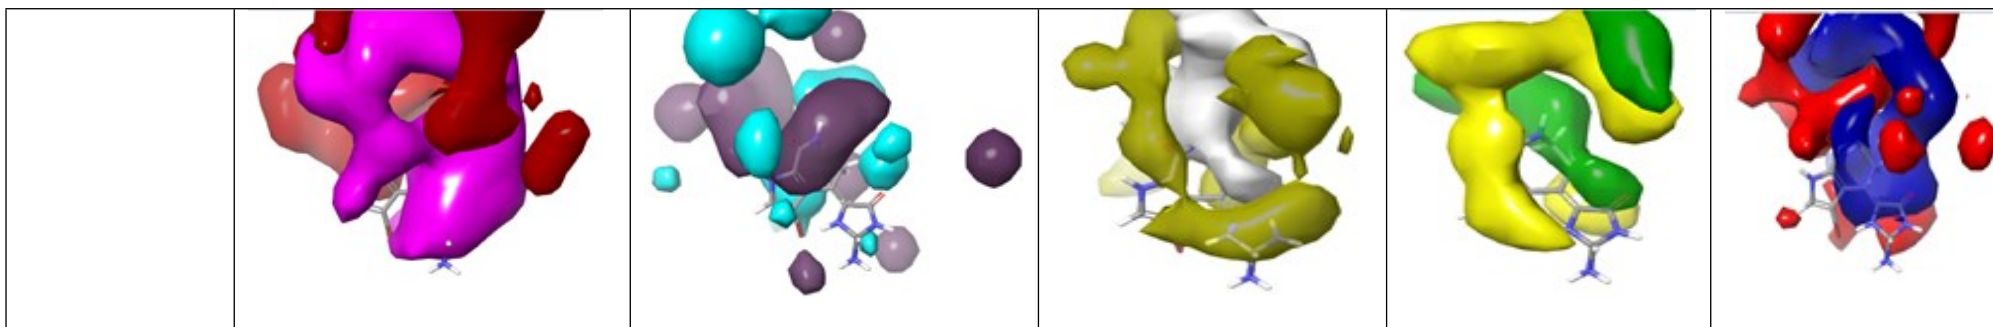

Table S-3: Atom-Based QSAR Contour Map Visualization

| Compound                  | Electron withdrawing                                                               | H-bond donor                                                                        | Hydrophobic                                                                          | Positive ionic                                                                       |
|---------------------------|------------------------------------------------------------------------------------|-------------------------------------------------------------------------------------|--------------------------------------------------------------------------------------|--------------------------------------------------------------------------------------|
| (+)-N-methylisococlaurine | 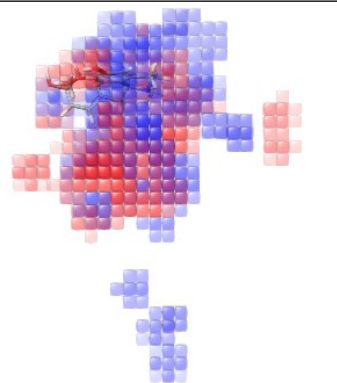 |  |  |  |

Boldine

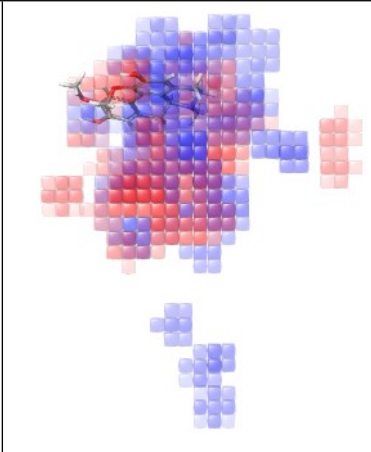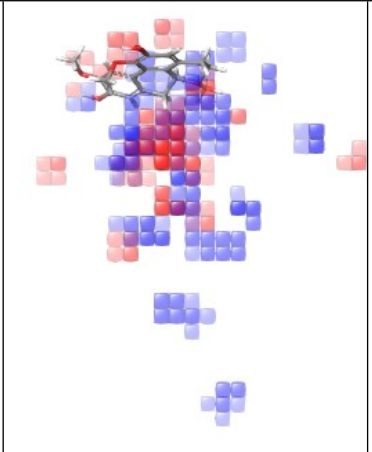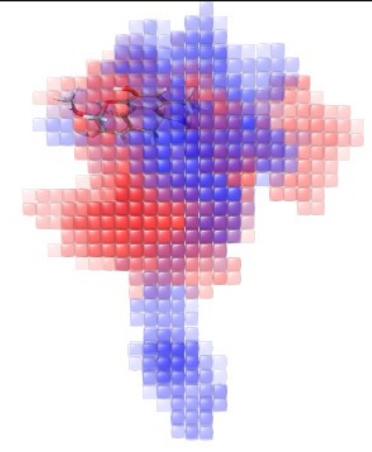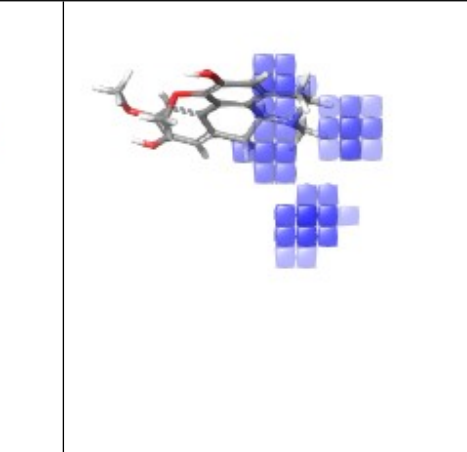

Carpaine

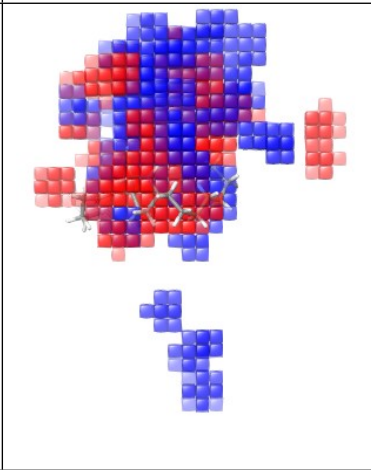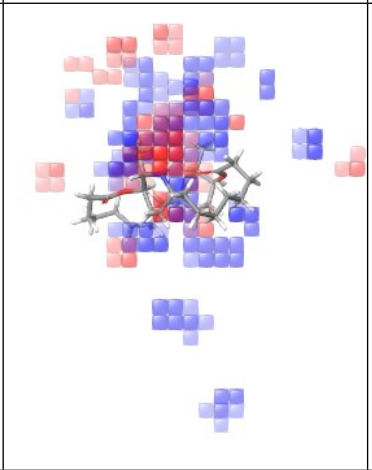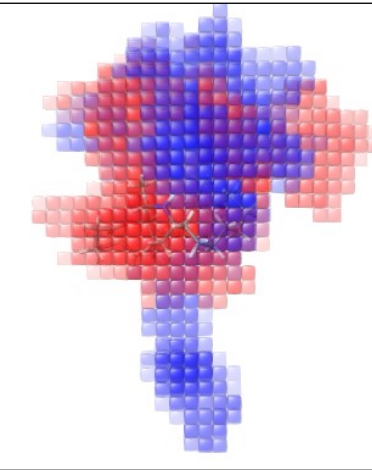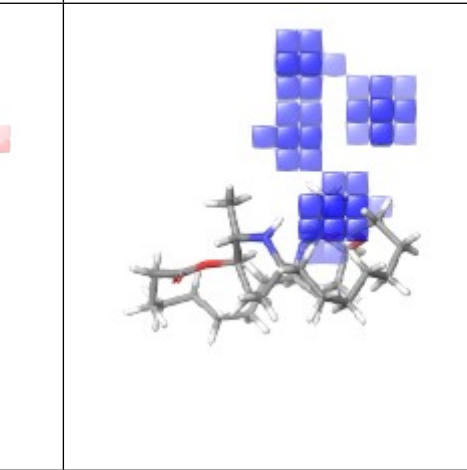

|                 |                                                                                                                                                                                                                                                                                                                                                                                                                       |                                                                                                                                                                                                                                                                                                                                                         |                                                                                                                                                                                                                                                                                                                                                          |                                                                                                                                                                                                                                                                                                                                                           |
|-----------------|-----------------------------------------------------------------------------------------------------------------------------------------------------------------------------------------------------------------------------------------------------------------------------------------------------------------------------------------------------------------------------------------------------------------------|---------------------------------------------------------------------------------------------------------------------------------------------------------------------------------------------------------------------------------------------------------------------------------------------------------------------------------------------------------|----------------------------------------------------------------------------------------------------------------------------------------------------------------------------------------------------------------------------------------------------------------------------------------------------------------------------------------------------------|-----------------------------------------------------------------------------------------------------------------------------------------------------------------------------------------------------------------------------------------------------------------------------------------------------------------------------------------------------------|
| Diazepinomicin  | 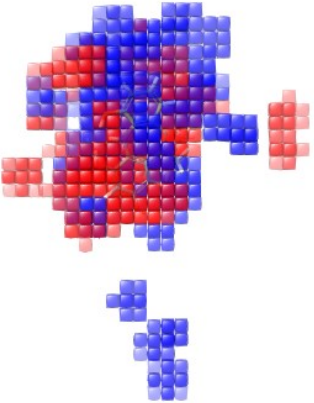 A top-down electrostatic potential map of Diazepinomicin. The molecule is represented by a grid of red and blue squares. The red squares, indicating negative charge, are concentrated in the lower-left and central regions. The blue squares, indicating positive charge, are primarily in the upper-right and central regions.   |  A side-view electrostatic potential map of Diazepinomicin. The molecule is shown as a grey stick model with a semi-transparent electrostatic potential surface. The surface is colored red where it is negatively charged and blue where it is positively charged.   |  A back-view electrostatic potential map of Diazepinomicin. The molecule is shown as a grey stick model with a semi-transparent electrostatic potential surface. The surface is colored red where it is negatively charged and blue where it is positively charged.   |  A front-view electrostatic potential map of Diazepinomicin. The molecule is shown as a grey stick model with a semi-transparent electrostatic potential surface. The surface is colored red where it is negatively charged and blue where it is positively charged.   |
| hymenocardine-H |  A top-down electrostatic potential map of hymenocardine-H. The molecule is represented by a grid of red and blue squares. The red squares, indicating negative charge, are concentrated in the lower-left and central regions. The blue squares, indicating positive charge, are primarily in the upper-right and central regions. |  A side-view electrostatic potential map of hymenocardine-H. The molecule is shown as a grey stick model with a semi-transparent electrostatic potential surface. The surface is colored red where it is negatively charged and blue where it is positively charged. |  A back-view electrostatic potential map of hymenocardine-H. The molecule is shown as a grey stick model with a semi-transparent electrostatic potential surface. The surface is colored red where it is negatively charged and blue where it is positively charged. |  A front-view electrostatic potential map of hymenocardine-H. The molecule is shown as a grey stick model with a semi-transparent electrostatic potential surface. The surface is colored red where it is negatively charged and blue where it is positively charged. |



|                                 |                                                                                    |                                                                                     |                                                                                      |                                                                                     |
|---------------------------------|------------------------------------------------------------------------------------|-------------------------------------------------------------------------------------|--------------------------------------------------------------------------------------|-------------------------------------------------------------------------------------|
| <p>longamide B</p>              | 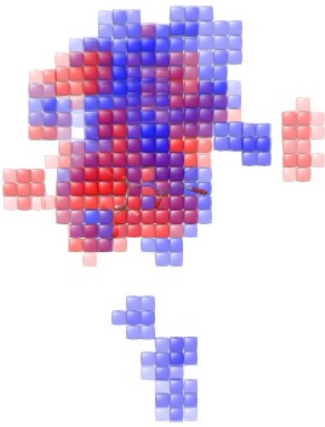  |   |   |  |
| <p>O-desmethylnummularine-R</p> |  |  |  |  |

|                   |                                                                                                                                                                                                                                                                                                                                                                                                    |                                                                                                                                                                                                                                                                                                                                                                                                                                                |                                                                                                                                                                                                                                                                                                                                    |                                                                                                                                                                                                                                                                                                                                                                                                                 |
|-------------------|----------------------------------------------------------------------------------------------------------------------------------------------------------------------------------------------------------------------------------------------------------------------------------------------------------------------------------------------------------------------------------------------------|------------------------------------------------------------------------------------------------------------------------------------------------------------------------------------------------------------------------------------------------------------------------------------------------------------------------------------------------------------------------------------------------------------------------------------------------|------------------------------------------------------------------------------------------------------------------------------------------------------------------------------------------------------------------------------------------------------------------------------------------------------------------------------------|-----------------------------------------------------------------------------------------------------------------------------------------------------------------------------------------------------------------------------------------------------------------------------------------------------------------------------------------------------------------------------------------------------------------|
| paenidigyamycin A | 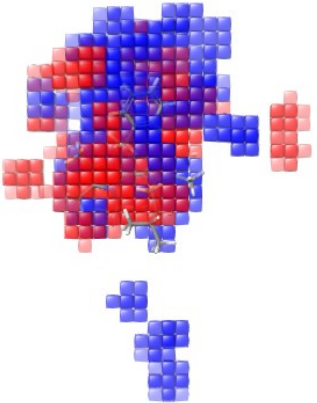 A 3D electrostatic potential map of paenidigyamycin A, showing a complex, multi-lobed structure. The map is color-coded by charge, with red indicating negative charge and blue indicating positive charge. The molecule is shown in a perspective view, highlighting its overall shape and charge distribution. |  A 3D electrostatic potential map of paenidigyamycin A, similar to the first image, but with a stick model of the molecule overlaid. The stick model is rendered in a grey and red color scheme, showing the carbon and oxygen atoms respectively. This view allows for a direct comparison between the electrostatic potential and the molecular structure. |  A 3D electrostatic potential map of paenidigyamycin A, showing a different perspective or a different set of parameters compared to the first image. The red and blue regions are more pronounced, indicating a different charge distribution. |  A 3D electrostatic potential map of paenidigyamycin A with a stick model overlaid. The stick model is rendered in a grey and blue color scheme, showing the carbon and nitrogen atoms respectively. This view highlights the interaction between the electrostatic potential and the nitrogen-containing functional groups. |
| Palauamine        |  A 3D electrostatic potential map of Palauamine, showing a complex, multi-lobed structure. The map is color-coded by charge, with red indicating negative charge and blue indicating positive charge. The molecule is shown in a perspective view, highlighting its overall shape and charge distribution.       |  A 3D electrostatic potential map of Palauamine, similar to the first image, but with a stick model of the molecule overlaid. The stick model is rendered in a grey and red color scheme, showing the carbon and oxygen atoms respectively. This view allows for a direct comparison between the electrostatic potential and the molecular structure.       |  A 3D electrostatic potential map of Palauamine, showing a different perspective or a different set of parameters compared to the first image. The red and blue regions are more pronounced, indicating a different charge distribution.       |  A 3D electrostatic potential map of Palauamine with a stick model overlaid. The stick model is rendered in a grey and blue color scheme, showing the carbon and nitrogen atoms respectively. This view highlights the interaction between the electrostatic potential and the nitrogen-containing functional groups.       |

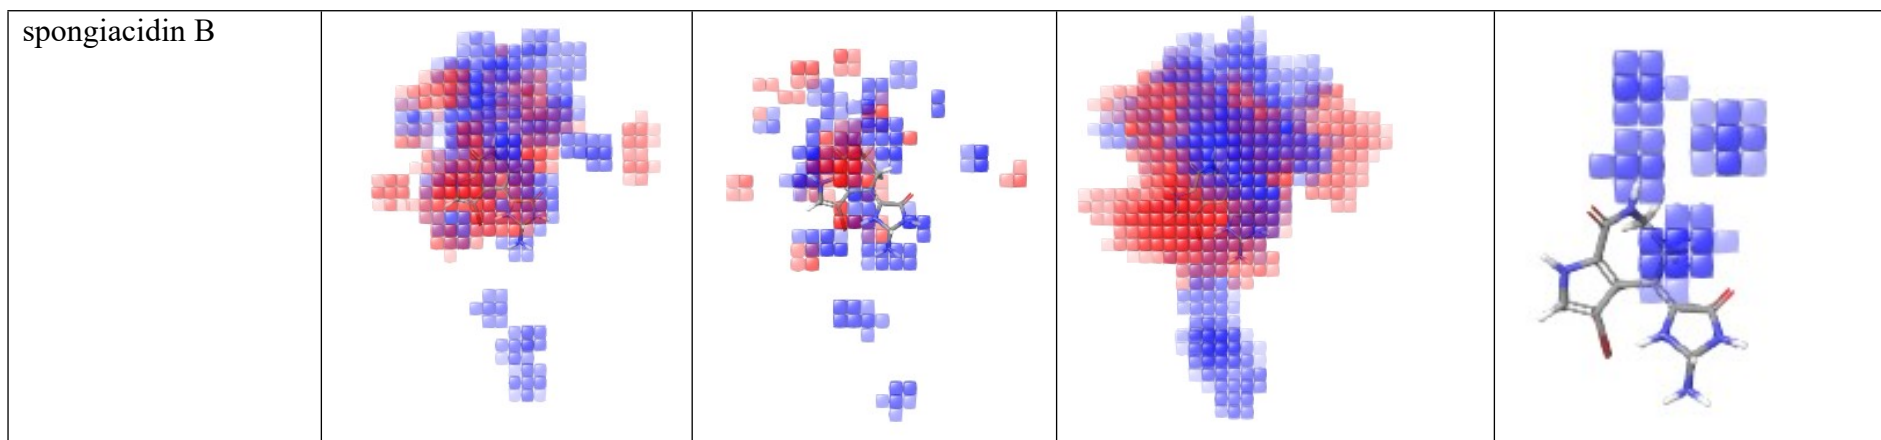

Table S-4: Ramachandran Plot Statistics

| Ramachandran Plot                      | PDB ID    |           |            |           |           |           |           |           |           |           |           |           |
|----------------------------------------|-----------|-----------|------------|-----------|-----------|-----------|-----------|-----------|-----------|-----------|-----------|-----------|
|                                        | 7AVT      | 6SFR      | 6YNE       | 6W8H      | 7JX2      | 7JWR      | 7JVY      | 7JZ5      | 7JWD      | 6W81      | 6VF1      | 6UX9      |
| Residues in most favored regions       | 778=93.8% | 770=93.0% | 1049=91.1% | 335=93.1% | 112=90.3% | 232=92.4% | 228=91.9% | 229=92.3% | 230=92.0% | 479=92.1% | 267=94.3% | 519=92.0% |
| Residues in Additional Allowed regions | 51= 6.2%  | 58=7.0%   | 95=8.2%    | 23=6.4%   | 11=8.9%   | 17=6.8%   | 18=7.3%   | 17=6.9%   | 18=7.2%   | 38=7.3%   | 16=5.7%   | 43=7.6%   |
| Residues in generously allowed regions | 0=0.0%    | 0=0.0%    | 4=0.3%     | 2=0.6%    | 1=0.8%    | 2=0.8%    | 2=0.8%    | 2=0.8%    | 2=0.8%    | 1=0.2%    | 0=0.0%    | 2=0.4%    |
| Residues in disallowed regions         | 0=0.0%    | 0=0.0%    | 4=0.3%     | 0=0.0%    | 0=0.0%    | 0=0.0%    | 0=0.0%    | 0=0.0%    | 0=0.0%    | 2=0.4%    | 0=0.0%    | 0=0.0%    |

|                                                |            |            |             |            |            |            |            |            |            |            |            |            |
|------------------------------------------------|------------|------------|-------------|------------|------------|------------|------------|------------|------------|------------|------------|------------|
| Number of non-glycine and non-proline residues | 829=100.0% | 828=100.0% | 1152=100.0% | 360=100.0% | 124=100.0% | 251=100.0% | 248=100.0% | 248=100.0% | 250=100.0% | 520=100.0% | 283=100.0% | 564=100.0% |
| Number of end-residues                         | 7          | 7          | 4           | 3          | 2          | 4          | 3          | 3          | 4          | 4          | 22         | 13         |
| Number of glycine residues                     | 29         | 29         | 132         | 14         | 9          | 18         | 18         | 18         | 18         | 66         | 26         | 24         |
| Number of proline residues                     | 64         | 64         | 48          | 20         | 0          | 1          | 1          | 1          | 1          | 12         | 18         | 27         |
| Total number of residues                       | 929        | 928        | 1336        | 397        | 135        | 274        | 270        | 270        | 273        | 602        | 349        | 628        |

Table S-5: Docking score and interactions of compounds with their respective proteins

| Protein    | Compounds name           | No. of interactions | Residues  | Types of protein-ligand interaction by | Distance | Docking score | H-bond |
|------------|--------------------------|---------------------|-----------|----------------------------------------|----------|---------------|--------|
| 6UX9       | (+)N-methylisococlaurine | 1                   | ASP 359   | H-bonding                              | 2.14     | -7.727        | 1      |
|            |                          | 1                   | PHE 134   | Pi-pi stacking                         | 4.29     |               |        |
|            | spongiacidin B           | 1                   | ASN 198   | H-Bonding                              | 1.92     | -6.736        | 2      |
|            |                          | 1                   | ASN 124   | H-bonding                              | 1.85     |               |        |
|            | Diazepinomicin           | 1                   | LYS 228   | Pi-cation                              | 4.46     | -6.431        | 3      |
|            |                          | 1                   | ASP 211   | H-bonding                              | 1.71     |               |        |
|            |                          | 1                   | LYS 234   | H-bonding                              | 2.35     |               |        |
|            |                          | 1                   | GLU 225   | H-bonding                              | 1.72     |               |        |
|            | Boldine                  | 1                   | ASN 198   | H-bonding                              | 2.02     | -5.972        | 1      |
|            | longamide B              | 1                   | VAL 199   | Halogen bond                           | 2.46     | -5.279        | 1      |
|            |                          | 1                   | PHE 200   | Pi-pi stacking                         |          |               |        |
|            |                          | 1                   | LYS 209   | H-bonding                              | 1.84     |               |        |
| Palauamine | 1                        | ASP 359             | H-bonding | 2.13                                   | -4.455   | 3             |        |
|            | 1                        | ALA 132             | H-bonding | 1.95                                   |          |               |        |
|            | 1                        | GLU 225             | H-bonding | 1.65                                   |          |               |        |

|                 |                           |         |                    |                    |        |        |   |
|-----------------|---------------------------|---------|--------------------|--------------------|--------|--------|---|
|                 | Oseltamivir               | 1       | VAL-199            | H-bonding          | 1.69   | -7.119 | 3 |
|                 |                           | 1       | ASP-359            | H-bonding          | 2.47   |        |   |
|                 |                           | 1       | LYS—145            | H-bonding          | 2.68   |        |   |
| <i>6VFI</i>     | (+)–N-methylisococlaurine | 1       | GOA 506            | H-bonding          | 1.58   | -8.672 | 1 |
|                 |                           | 2       | MG 502             | Metal-coordination | 2.10   |        |   |
|                 |                           |         | MG 502             | Metal-coordination | 2.38   |        |   |
|                 | Palauamine                | 1       | ASP 418            | H-bonding          | 2.46   | -8.258 | 1 |
|                 |                           | 1       | MG 502             | Metal coordination | 2.06   |        |   |
|                 |                           | 1       | MG 501             | Metal coordination | 2.22   |        |   |
|                 | longamide B               | 1       | GOA 506            | H-bonding          | 2.00   | -7.86  | 1 |
|                 |                           | 2       | MG 502             | Metal coordination | 1.99   |        |   |
|                 |                           |         | MG 502             | Metal coordination | 2.36   |        |   |
|                 |                           | 1       | MG 501             | Metal coordination | 2.25   |        |   |
|                 | Boldine                   | 1       | MG 502             | Metal coordination | 2.24   | -7.588 | 0 |
|                 |                           | 1       | MG 501             | Metal coordination | 2.07   |        |   |
| spongiacidin B  | 1                         | GOA 506 | H-bonding          | 2.50               | -7.087 | 1      |   |
|                 | 1                         | MG 502  | Metal coordination | 2.06               |        |        |   |
|                 | 1                         | MG 501  | Metal coordination | 2.27               |        |        |   |
| Diazepinomicin  | 1                         | MG 501  | Metal coordination | 2.28               | -6.499 | 0      |   |
|                 | 1                         | TRP 434 | Pi-pi stacking     | 3.96               |        |        |   |
| Carpaine        | 1                         | MG 502  | Metal coordination | 2.13               | -6.238 | 0      |   |
| hymenocardine-H | 1                         | MG 501  | Metal coordination | 2.42               | -5.898 | 0      |   |
|                 | 1                         | MG 502  | Metal coordination | 2.04               |        |        |   |
| Oseltamivir     | 1                         | GOA 506 | H-bonding          | 1.79               | -7.833 | 2      |   |
|                 | 1                         | GLY 433 | H-bonding          | 1.89               |        |        |   |
|                 | 1                         | MG 501  | Metal coordination | 2.27               |        |        |   |
|                 | 1                         | MG 502  | Metal coordination | 2.06               |        |        |   |
| <i>6W81</i>     | hymenocardine-H           | 2       | GLU 165            | H-bonding          | 2.29   | -7.635 | 3 |
|                 |                           |         | GLU 165            | H-bonding          | 1.60   |        |   |
|                 |                           | 1       | HIE 162            | H-bonding          | 1.91   |        |   |
|                 | (+)–N-methylisococlaurine | 1       | GLN 191            | H-bonding          | 1.90   | -7.043 | 1 |
|                 | Palauamine                | 1       | PRO 188            | H-bonding          | 2.73   | -6.988 | 4 |
| 2               |                           | GLN 191 | H-bonding          | 1.96               |        |        |   |
|                 |                           | GLN 191 | H-bonding          | 2.05               |        |        |   |
| 1               |                           | GLU 165 | H-bonding          | 2.12               |        |        |   |
| Boldine         | 1                         | GLU 165 | H-bonding          | 1.81               | -6.764 | 1      |   |

|                |                           |         |                |                |        |        |   |
|----------------|---------------------------|---------|----------------|----------------|--------|--------|---|
|                | spongiacidin B            | 1       | HIE 162        | H-bonding      | 1.99   | -6.698 | 3 |
|                |                           | 1       | ILE 140        | H-bonding      | 1.93   |        |   |
|                |                           | 1       | GLY 142        | H-bonding      | 2.14   |        |   |
|                | Diazepinomicin            | 1       | GLU 165        | H-bonding      | 2.52   | -6.332 | 2 |
|                |                           | 1       | THR 189        | H-bonding      | 1.81   |        |   |
|                | paenidigyamycin A         | 1       | HIE 41         | Pi-pi stacking | 5.36   | -5.766 | 0 |
|                | longamide B               | 1       | GLU 165        | Halogen bond   | 3.22   | -5.543 | 0 |
|                | O-desmethylnummularine-R  | 1       | GLU 165        | H-bonding      | 2.71   | -5.355 | 3 |
| 1              |                           | ALA 143 | H-bonding      | 2.68           |        |        |   |
| 1              |                           | GLY 142 | H-bonding      | 2.36           |        |        |   |
| Carpaine       | 1                         | GLY 142 | H-bonding      | 2.33           | -5.053 | 1      |   |
| Oseltamivir    | 1                         | GLN 187 | H-bonding      | 1.99           | -5.131 | 2      |   |
|                | 1                         | GLY 167 | H-bonding      | 2.51           |        |        |   |
| 7JWD           | Diazepinomicin            | 1       | GLU 72         | H-bonding      | 1.69   | -8.068 | 2 |
|                |                           | 1       | ASP 78         | H-bonding      | 2.43   |        |   |
|                |                           | 1       | TYR 19         | Pi-pi stacking | 5.03   |        |   |
|                | Boldine                   | 1       | ASP 78         | H-bonding      | 2.13   | -7.823 | 1 |
|                |                           | 1       | PHE 16         | Pi-pi stacking | 5.01   |        |   |
|                | (+)-N-methylisococlaurine | 1       | PHE 16         | Pi-pi stacking | 5.35   | -7.512 | 0 |
|                | spongiacidin B            | -       | -              | -              | -      | -7.262 | 0 |
| longamide B    | 1                         | THR 53  | H-bonding      | 2.04           | -6.897 | 1      |   |
|                | 1                         | PHE 16  | Pi-pi stacking | 5.15           |        |        |   |
| Oseltamivir    | -                         | -       | -              | -              | -5.591 | 0      |   |
| 7JZ5           | Boldine                   | 1       | TYR 19         | H-bonding      | 1.98   | -9     | 1 |
|                | Diazepinomicin            | 1       | THR 51         | H-bonding      | 2.51   | -8.623 | 2 |
|                |                           | 1       | ARG 104        | H-bonding      | 2.25   |        |   |
|                |                           | 1       | TYR 60         | Pi-pi stacking | 5.20   |        |   |
|                |                           | 1       | TYR 19         | Pi-pi stacking | 5.18   |        |   |
|                | (+)N-methylisococlaurine  | 1       | LYS 40         | H-bonding      | 2.37   | -7.467 | 1 |
|                |                           | 1       | PHE 16         | Pi-pi stacking | 5.11   |        |   |
| spongiacidin B | -                         | -       | -              | -              | -7.252 | 0      |   |
| longamide B    | 1                         | GLN 38  | Halogen bond   | 2.76           | -6.936 | 4      |   |
|                | 1                         | GLN 108 | H-bonding      | 2.06           |        |        |   |
|                | 1                         | GLN 97  | H-bonding      | 1.79           |        |        |   |
|                | 1                         | LYS 40  | H-bonding      | 1.95           |        |        |   |
|                | 1                         | GLU 72  | H-bonding      | 2.58           |        |        |   |

|             |                           |             |                |                |        |        |        |
|-------------|---------------------------|-------------|----------------|----------------|--------|--------|--------|
|             | Oseltamivir               | 1           | LYS 40         | H-bonding      | 2.02   | -6.632 | 2      |
|             |                           | 1           | ARG 104        | H-bonding      | 2.39   |        |        |
| 7JYV        | Diazepinomicin            | 1           | ASP 78         | H-bonding      | 1.80   | -8.351 | 1      |
|             | Boldine                   | 1           | PHE 16         | Pi-pi stacking | 5.45   | -8.117 | 0      |
|             | (+)-N-methylisococlaurine | 1           | PHE 16         | Pi-pi stacking | 5.49   | -7.982 | 0      |
|             | spongiacidin B            | -           | -              | -              | -      | -7.081 | 0      |
|             | longamide B               | 1           | GLN 97         | H-bonding      | 1.94   | -7.08  | 4      |
|             |                           | 1           | GLU 72         | H-bonding      | 2.27   |        |        |
|             |                           | 1           | GLN 108        | H-bonding      | 2.42   |        |        |
|             |                           | 1           | LYS 40         | H-bonding      | 1.83   |        |        |
|             | 1                         | LYS 40      | Halogen bond   | 2.69           |        |        |        |
|             | 1                         | GLN 38      | Halogen bond   | 2.87           |        |        |        |
|             | Oseltamivir               | 1           | GLN 38         | H-bonding      | 2.63   | -6.355 | 1      |
| 7JWR        | Diazepinomicin            | -           | -              | -              | -      | -9.417 | 0      |
|             | Boldine                   | 1           | TYR 19         | H-bonding      | 2.13   | -9.152 | 1      |
|             | (+)-N-methylisococlaurine | 1           | TYR 19         | H-bonding      | 2.15   | -8.091 | 1      |
|             | spongiacidin B            | 1           | TYR 19         | H-bonding      | 2.10   | -7.317 | 1      |
|             | longamide B               | 1           | THR 53         | H-bonding      | 1.88   | -6.932 | 1      |
|             |                           | 1           | PHE 16         | Pi-pi stacking | 5.32   |        |        |
|             |                           | Oseltamivir | -              | -              | -      | -      | -6.329 |
| 7jx2        | (+)-N-methylisococlaurine | 1           | TYR 19         | H-bonding      | 2.68   | -7.607 | 1      |
|             | Diazepinomicin            | 1           | THR 53         | H-bonding      | 2.20   | -7.384 | 1      |
|             |                           | 1           | PHE 16         | Pi-pi stacking | 5.14   |        |        |
|             | longamide B               | 1           | GLN 108        | H-bonding      | 2.14   | -7.217 | 4      |
|             |                           | 1           | LYS 40         | H-bonding      | 2.00   |        |        |
|             |                           | 1           | GLU 72         | H-bonding      | 2.49   |        |        |
|             |                           | 1           | GLN 97         | H-bonding      | 1.78   |        |        |
|             |                           | 1           | LYS 40         | Halogen bond   | 2.48   |        |        |
|             |                           | 1           | GLN 38         | Halogen bond   | 3.11   |        |        |
|             | spongiacidin B            | 1           | GLN 38         | H-bonding      | 2.26   | -6.953 | 1      |
|             | 1                         | PHE 16      | Pi-pi stacking | 5.08           |        |        |        |
| Boldine     | 1                         | PHE 16      | Pi-pi stacking | 4.73           | -6.824 | 0      |        |
| Oseltamivir | 1                         | ARG 58      | H-bonding      | 2.41           | -6.674 | 2      |        |
|             | 1                         | THR 53      | H-bonding      | 1.90           |        |        |        |

|                   |                            |          |                |                |        |        |        |
|-------------------|----------------------------|----------|----------------|----------------|--------|--------|--------|
| 6W8H              | Diazepinomicin             | 3        | GSH 201        | H-bonding      | 1.88   | -7.948 | 3      |
|                   |                            |          | GSH 201        | H-bonding      | 1.90   |        |        |
|                   |                            |          | GSH 201        | H-bonding      | 1.67   |        |        |
|                   | Boldine                    | 1        | GSH 201        | H-bonding      | 1.97   | -7.192 | 1      |
|                   |                            |          |                |                |        |        |        |
|                   | (+) -N-methylisococlaurine | 2        | TRP 104        | Pi-pi stacking | 4.30   | -6.339 | 0      |
|                   |                            |          | TRP 104        | Pi-pi stacking | 4.33   |        |        |
|                   | Palauamine 2               | 1        | TRP 104        | H-bonding      | 1.80   | -5.485 | 1      |
|                   |                            | 1        | GLN 36         | Halogen bond   | 2.20   |        |        |
|                   | spongiacidin B             | 1        | ARG 14         | Halogen bond   | 2.72   | -5.482 | 0      |
| paenidigyamycin A | 2                          | TRP 104  | Pi-pi stacking | 3.73           | -4.785 | 0      |        |
|                   |                            | TRP 104  | Pi-pi stacking | 3.93           |        |        |        |
|                   | 1                          | PHE 16   | Pi-pi stacking | 5.17           |        |        |        |
| longamide B       | 2                          | LYS 112  | Pi-cation      | 3.44           |        |        |        |
|                   |                            | LYS 112  | Pi-cation      | 6.45           |        |        |        |
|                   | -                          | -        | -              | -              |        |        | -4.341 |
| Oseltamivir       | 1                          | GLN 36   | H-bonding      | 2.02           | -4.229 | 1      |        |
| 6YNE              | Diazepinomicin             | 1        | ASN 136        | H-bonding      | 2.15   | -5.664 | 1      |
|                   |                            | 1        | PHE 131        | Pi-pi stacking | 5.03   |        |        |
|                   | Palauamine                 | 1        | LYS 219        | H-bonding      | 2.15   | -4.958 | 2      |
|                   |                            | 1        | MET 130        | H-bonding      | 2.03   |        |        |
|                   | (+) -N-methylisococlaurine | 1        | SER 125        | H-bonding      | 2.20   | -4.921 | 1      |
|                   | spongiacidin B             | 1        | ASN 136        | H-bonding      | 2.08   | -4.913 | 2      |
|                   |                            | 1        | LYS 139        | H-bonding      | 2.66   |        |        |
|                   | Boldine                    | 1        | ASN 136        | H-bonding      | 2.32   | -4.781 | 3      |
|                   |                            | 1        | LYS 219        | H-bonding      | 2.19   |        |        |
|                   |                            | 1        | ASP 127        | H-bonding      | 1.79   |        |        |
| longamide B       | 1                          | LYS 219  | H-bonding      | 1.60           | -4.521 | 3      |        |
|                   | 1                          | LYS 139  | H-bonding      | 2.61           |        |        |        |
|                   | 1                          | LYS 139  | H-bonding      | 2.58           |        |        |        |
| Oseltamivir       | 1                          | ASN 136  | H-bonding      | 2.30           | -3.941 | 1      |        |
| 6SFR              | (+) -N-methylisococlaurine | 1        | GLU 909        | H-bonding      | 1.66   | -6.181 | 1      |
|                   | spongiacidin B             | 1        | TYR 884        | Pi-pi stacking | 4.93   | -5.906 | 1      |
|                   |                            | 1        | ASN 879        | H-bonding      | 1.94   |        |        |
|                   | Boldine                    | 1        | ASN 879        | H-bonding      | 1.79   | -5.767 | 1      |
| 1                 |                            | TYR 884  | Pi-pi stacking | 5.36           |        |        |        |
|                   | 1                          | IMD 1102 | Pi-pi stacking | 5.08           |        |        |        |



|                   |                           |          |                |                |        |        |   |
|-------------------|---------------------------|----------|----------------|----------------|--------|--------|---|
|                   | longamide B               | 1        | LEU 901        | H-bonding      | 1.70   | -5.616 | 1 |
|                   |                           | 1        | IMD 1102       | Pi-pi stacking | 5.30   |        |   |
|                   | O-desmethylnummularine-R  | 1        | TYR 884        | Pi-pi stacking | 5.47   | -5.179 | 3 |
|                   |                           | 1        | TYR 884        | H-bonding      | 2.39   |        |   |
|                   |                           | 1        | ASN 879        | H-bonding      | 1.94   |        |   |
|                   |                           | 1        | GLU 902        | H-bonding      | 2.22   |        |   |
|                   | Palauamine                | 1        | GLU 906        | H-bonding      | 2.28   | -4.942 | 2 |
|                   |                           | 1        | GLU 902        | H-bonding      | 2.70   |        |   |
|                   |                           | 1        | HIE 905        | Pi-pi stacking | 5.28   |        |   |
|                   |                           | 1        | TYR 884        | Pi-pi stacking | 5.46   |        |   |
| Diazepinomicin    | 1                         | ASN 879  | H-bonding      | 1.67           | -4.747 | 1      |   |
|                   | 1                         | HIE 905  | Pi-pi stacking | 3.92           |        |        |   |
| paenidigyamycin A | 1                         | GLU 909  | Salt-bridge    | 4.86           | -4.66  | 0      |   |
|                   | 1                         | GLU 906  | Salt-bridge    | 3.99           |        |        |   |
|                   | 1                         | HIE 905  | Pi-pi stacking | 4.08           |        |        |   |
|                   | 1                         | IMD 1102 | Pi-pi stacking | 4.83           |        |        |   |
|                   | 1                         | IMD 1102 | Pi-pi stacking | 4.99           |        |        |   |
| Oseltamivir       | 1                         | TYR 884  | H-bonding      | 2.11           | -4.764 | 1      |   |
| 7AVT              | hymenocardine-H           | 1        | ASP 887        | H-bonding      | 1.51   | -5.866 | 2 |
|                   |                           | 1        | TYR 884        | H-bonding      | 2.04   |        |   |
|                   | Boldine                   | 1        | ASN 879        | H-bonding      | 1.79   | -5.364 | 2 |
|                   |                           | 1        | TYR 884        | Pi-pi stacking | 5.25   |        |   |
|                   | (+)-N-methylisococlaurine | 1        | GLU 906        | H-bonding      | 1.79   | -5.244 |   |
|                   | Diazepinomicin            | 1        | GLU 909        | H-bonding      | 2.25   | -5.102 | 3 |
|                   |                           | 2        | GLU 906        | H-bonding      | 1.61   |        |   |
|                   |                           |          | GLU 906        | H-bonding      | 1.69   |        |   |
|                   | Spongiacidin B            | 1        | TYR 884        | Pi-pi stacking | 5.13   | -5.095 | 1 |
|                   | Longamide B               | 1        | TYR 884        | Pi-pi stacking | 5.46   | -4.915 | 1 |
|                   |                           | 1        | LEU 901        | H-bonding      | 1.60   |        |   |
|                   | O-desmethylnummularine-R  | 1        | TYR 884        | Pi-pi stacking | 5.50   | -4.793 | 2 |
|                   |                           | 1        | ASN 879        | H-bonding      | 1.89   |        |   |
|                   |                           | 1        | TYR 884        | H-bonding      | 2.57   |        |   |
| Palauamine        | 1                         | IMD 1102 | Pi-pi stacking | 5.05           | -4.593 | 2      |   |
|                   | 1                         | GLU 909  | H-bonding      | 1.80           |        |        |   |
|                   | 1                         | GLU 902  | H-bonding      | 2.23           |        |        |   |
| Oseltamivir       | 1                         | GLU 902  | H-bonding      | 2.09           | -3.773 | 1      |   |

Table S-6: Binding free energies of all docked complexes

| <b>Proteins</b> | <b>Compounds</b>          | <b>MM-GBSA<br/>dG Bind</b> | <b>MM-GBSA dG<br/>Bind Coulomb</b> | <b>MMGBSA dG<br/>Bind vdW</b> | <b>MMGBSA dG<br/>Bind Lipo</b> |
|-----------------|---------------------------|----------------------------|------------------------------------|-------------------------------|--------------------------------|
| <b>6UX9</b>     | (+)-N-methylisococlaurine | -69.99                     | -20.77                             | -41.78                        | -29.15                         |
|                 | oseltamivir               | -66.66                     | -12.51                             | -49.61                        | -20.82                         |
|                 | spongiacidin B            | -49.15                     | -23.68                             | -36.2                         | -11.08                         |
|                 | diazepinomicin            | -76.73                     | -22.14                             | -58.29                        | -29.3                          |
|                 | Boldine                   | -66.4                      | -19.52                             | -40.59                        | -28.21                         |
|                 | longamide B               | -52.04                     | -14.7                              | -35.81                        | -10.49                         |
|                 | palauamine                | -50.67                     | -28.05                             | -40.04                        | -14.9                          |
|                 | Carpaine                  | -35.97                     | -2.29                              | -47.29                        | -15.29                         |
| <b>7JX2</b>     | (+)-N-methylisococlaurine | -70.2                      | -0.14                              | -43.66                        | -32.72                         |
|                 | diazepinomicin            | -80.96                     | -6.92                              | -63.82                        | -41.21                         |
|                 | Longamide B               | -42.81                     | -20.46                             | -32.42                        | -9.18                          |
|                 | Spongiacidin B            | -36.37                     | -1.07                              | -32.32                        | -11.38                         |
|                 | Boldine                   | -71.42                     | 4.45                               | -56.34                        | -36.8                          |
|                 | oseltamivir               | -54.32                     | 0.58                               | -50.06                        | -20.26                         |
| <b>6SFR</b>     | (+)-N-methylisococlaurine | -34.89                     | -4.1                               | -25.72                        | -16                            |
|                 | Spongiacidin B            | -26.51                     | -0.55                              | -32.61                        | -9.39                          |
|                 | Boldine                   | -37.41                     | 6.95                               | -36.56                        | -21.15                         |
|                 | Longamide B               | -36.03                     | -7.81                              | -31.27                        | -6.57                          |
|                 | O-desmethylnumularine-R   | -35.37                     | -7.83                              | -47                           | -17.02                         |
|                 | palauamine                | -8.73                      | -11.96                             | -35.03                        | -11.01                         |
|                 | oseltamivir               | -35.22                     | -9.58                              | -30.66                        | -11.13                         |
|                 | diazepinomicin            | -26.83                     | 4.13                               | -37.67                        | -16.7                          |
|                 | paenidigyamycin A         | -60.21                     | -4.13                              | -45.9                         | -22.64                         |
|                 | hymenocardine-H           | -26.48                     | -35.14                             | -34.46                        | -8.71                          |
|                 | Carpaine                  | -24.89                     | -14.29                             | -35.61                        | -12.94                         |
| <b>6W81</b>     | hymenocardine-H           | -72.59                     | -49.52                             | -55.22                        | -18.27                         |
|                 | (+)-N-methylisococlaurine | -51.04                     | -23.72                             | -30.75                        | -14.91                         |

|             |                           |        |        |        |        |
|-------------|---------------------------|--------|--------|--------|--------|
|             | palauamine                | -57.48 | -34    | -24.74 | -9.24  |
|             | Boldine                   | -51.9  | -17.83 | -39.46 | -14.46 |
|             | spongiacidin B            | -45.22 | -39.16 | -46.28 | -5.07  |
|             | Diazepinomicin            | -44.6  | -9.68  | -45.96 | -11.23 |
|             | paenidigyamycin A         | -66.97 | -67.5  | -56.87 | -20.51 |
|             | longamide B               | -30.37 | -28    | -19.14 | -3.13  |
|             | O-desmethylnummularine-R  | -57.79 | -14.7  | -57.81 | -20.47 |
|             | oseltamivir               | -45.46 | -28.73 | -22.36 | -7.07  |
|             | Carpaine                  | -53.52 | -15.97 | -57.61 | -13.45 |
| <b>7AVT</b> | hymenocardine-H           | -34.93 | -11.49 | -45.02 | -15.48 |
|             | Boldine                   | -44.27 | -18.45 | -35.48 | -19.24 |
|             | (+)-N-methylisococlaurine | -37.42 | -20.09 | -28.63 | -15.67 |
|             | diazepinomicin            | -35.34 | -9.9   | -35.07 | -13.26 |
|             | Spongiacidin B            | -30.89 | -2.5   | -34.18 | -9.37  |
|             | Longamide B               | -35.38 | -15.9  | -33.84 | -6.08  |
|             | O-desmethylnummularine-R  | -46.9  | -17.78 | -44.33 | -16.49 |
|             | palauamine                | -24.5  | -15.04 | -33.79 | -9.94  |
|             | paenidigyamycin A         | -63.86 | -1.99  | -44.68 | -24.34 |
|             | oseltamivir               | -37.82 | -15.55 | -34.24 | -12.43 |
| <b>6W8H</b> | Diazepinomicin            | -69.55 | -21.57 | -50.64 | -19.84 |
|             | Boldine                   | -67.73 | -19.07 | -37.23 | -26.06 |
|             | (+)-N-methylisococlaurine | -62    | -19.18 | -35.87 | -23.65 |
|             | palauamine                | -56.84 | -29.8  | -40.38 | -13.48 |
|             | spongiacidin B            | -43.16 | -32.55 | -43.44 | -12.61 |
|             | paenidigyamycin A         | -64.33 | 42.83  | -51.82 | -31.39 |
|             | longamide B               | -39.52 | -0.95  | -33.67 | -8.1   |
|             | oseltamivir               | -39.85 | -13.44 | -35.58 | -16.51 |
|             | O-desmethylnummularine-R  | -57.96 | -3.62  | -54.34 | -22.26 |
|             | hymenocardine-H           | -55.53 | -8.24  | -53.3  | -20.84 |
|             | Carpaine                  | -48.85 | 9.19   | -45.77 | -17.43 |
| <b>6YNE</b> | diazepinomicin            | -71.21 | -34.78 | -21.03 | -37.66 |

|             |                           |         |        |         |        |
|-------------|---------------------------|---------|--------|---------|--------|
|             | palauamine                | -43.83  | -21.13 | -7.96   | -33.61 |
|             | (+)-N-methylisococlaurine | -42.87  | -27.05 | -14.99  | -27.25 |
|             | spongiacidin B            | -31.4   | -17.19 | -6.3    | -25.02 |
|             | Boldine                   | -46.89  | -17.36 | -13.93  | -27.83 |
|             | longamide B               | -33.73  | -19.62 | -4.21   | -22.53 |
|             | oseltamivir               | -40.27  | -18.83 | -9.35   | -31.26 |
|             | hymenocardine-H           | -49.46  | -25.18 | -12.46  | -44.83 |
|             | paenidigyamycin A         | -46.35  | 63.19  | -17.05  | -38.19 |
|             | Carpaine                  | -35.69  | -6.93  | -8.71   | -31.9  |
|             | O-desmethylnummularine-R  | -23.78  | 7.61   | -8.59   | -34.51 |
| <b>7JVY</b> | Diazepinomicin            | -70.98  | -3.51  | -52.13  | -38.75 |
|             | Boldine                   | -47.49  | 14.22  | -36.44  | -25.09 |
|             | (+)-N-methylisococlaurine | -41.19  | 14.45  | -32.16  | -24.12 |
|             | spongiacidin B            | -25.99  | -0.97  | -25.93  | -2.2   |
|             | longamide B               | -25.68  | -15.88 | -10.3   | 0.82   |
|             | oseltamivir               | -38.17  | -3.27  | -27.9   | -10.43 |
| <b>7JWD</b> | Diazepinomicin            | -68.22  | 3.69   | -56.3   | -35.85 |
|             | Boldine                   | -64.23  | -12.84 | -47.01  | -32.3  |
|             | (+)-N-methylisococlaurine | -58.51  | 2.69   | -50.06  | -31.52 |
|             | spongiacidin B            | -43.11  | -4.68  | -41.35  | -10.45 |
|             | longamide B               | -50.73  | 4.63   | -47.27  | -10.2  |
|             | oseltamivir               | -60.98  | -8.77  | -49.02  | -18.57 |
| <b>6VF1</b> | (+)-N-methylisococlaurine | 1641.94 | -4.31  | 462.43  | -22.64 |
|             | boldine                   | 125.75  | 5.16   | 9.08    | -21.17 |
|             | carpaine                  | 1389.57 | 77.14  | 426.37  | -3.16  |
|             | diazepinomicin            | 91.49   | 20.42  | 1.64    | -17.97 |
|             | hymenocardine-H           | 439.83  | 28.98  | 127.17  | -18.54 |
|             | longamide B               | 78.69   | 10.16  | -7.91   | -6.62  |
|             | O-desmethylnummularine-R  | 85.46   | -0.6   | 14.64   | -28.38 |
|             | oseltamivir               | 46.24   | 46.05  | -8.71   | -12.79 |
|             | paenidigyamycin A         | 3293.07 | 216.57 | 1011.98 | -24.2  |

|             |                           |         |        |        |        |
|-------------|---------------------------|---------|--------|--------|--------|
| <b>7JWR</b> | palauamine                | 2155.23 | 12.36  | 593.8  | -10.78 |
|             | spongiacidin B            | 20.97   | -9.98  | 3.07   | -5.18  |
|             | Diazepinomicin            | -67.53  | 0.2    | -54.92 | -31.57 |
|             | Boldine                   | -74.74  | -6.01  | -45.14 | -33.36 |
|             | (+)-N-methylisococlaurine | -69.66  | -11.13 | -40.87 | -33.02 |
|             | spongiacidin B            | -44.14  | -22.01 | -35.27 | -12.63 |
|             | longamide B               | -52.3   | -14.33 | -43.73 | -11.14 |
|             | oseltamivir               | -58.5   | -3.43  | -49.87 | -21.18 |

Table S-7: ADMET Pharmacokinetic Properties of the top three compounds

| Variant                   | CNS | mol MW  | Donor HB | Accept HB | logP   | logS   | QPPCaco | QPlogBB | QPPMDCK | logKp  | QPlogKhsa | Percent Human Oral Absorption | Rule Of Five |
|---------------------------|-----|---------|----------|-----------|--------|--------|---------|---------|---------|--------|-----------|-------------------------------|--------------|
| (+)-N-methylisococlaurine | 1   | 299.369 | 2        | 4.25      | 32.19  | -2.912 | 244.511 | -0.312  | 119.413 | -4.353 | 0.238     | 84.536                        | 0            |
| Diazepinomicin            | -2  | 462.588 | 4        | 5.75      | 50.627 | -7.244 | 209.925 | -2.13   | 91.534  | -2.957 | 0.943     | 100                           | 0            |
| hymenocardine-H           | -2  | 653.82  | 2.75     | 14        | 65.658 | -3.908 | 96.477  | -1.057  | 71.97   | -4.162 | -0.703    | 46.753                        | 2            |

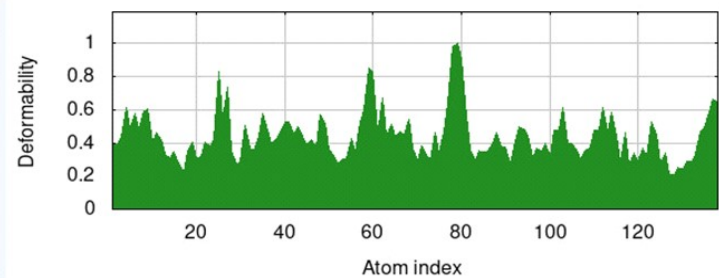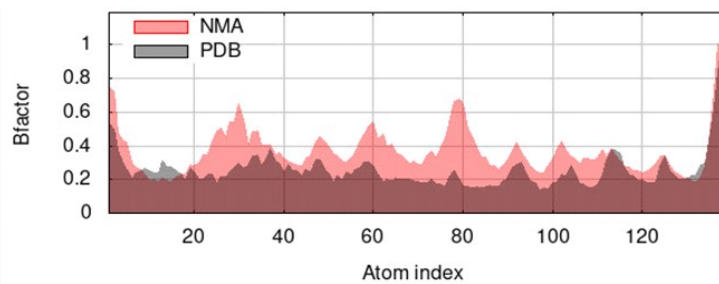

(A)

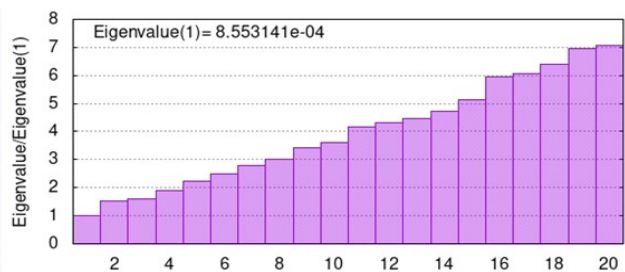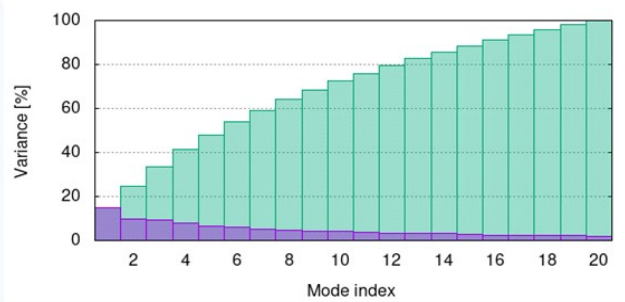

(B)

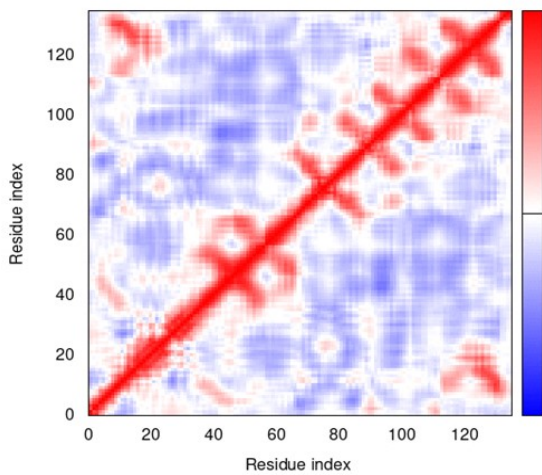

(C)

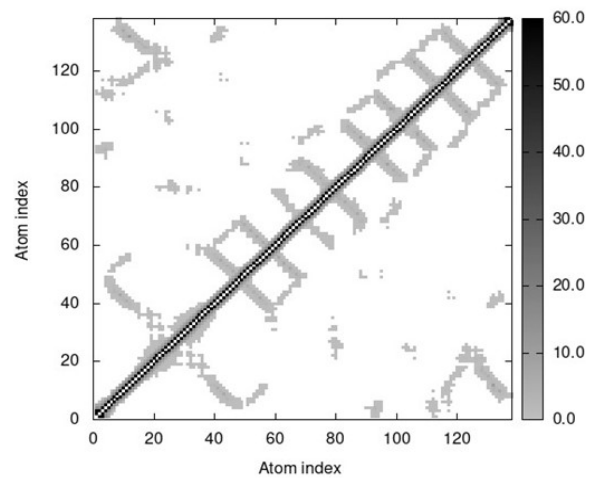

(D)

Figure S1: results of MD stimulation (A) Deformability and B-factor, (B) Eigenvalue and variance, (C) residue index, (D) atom index of 7JWR-diazepinomicin

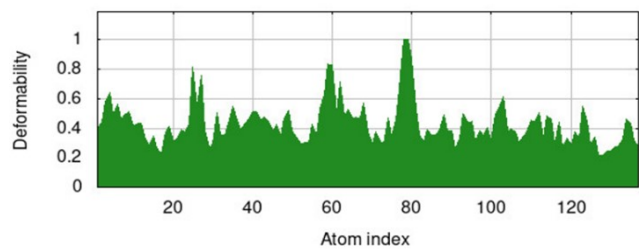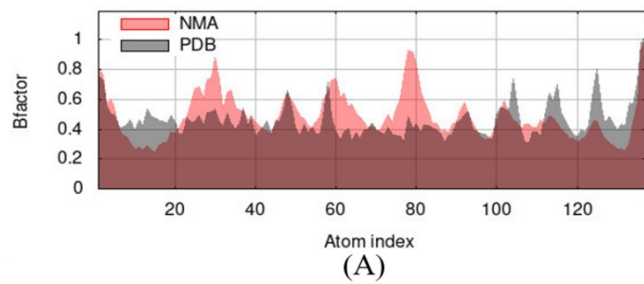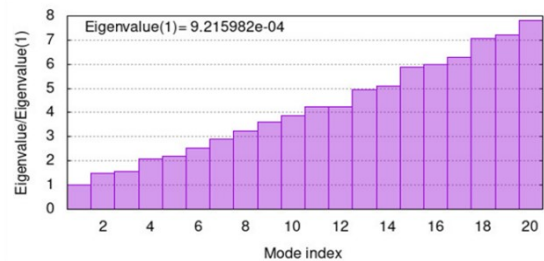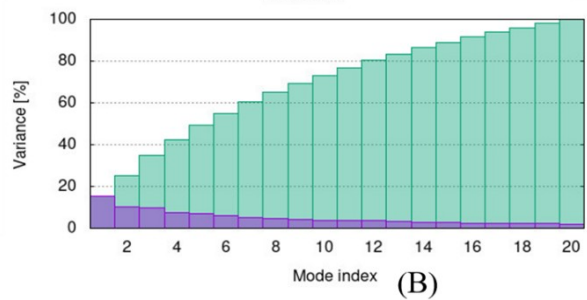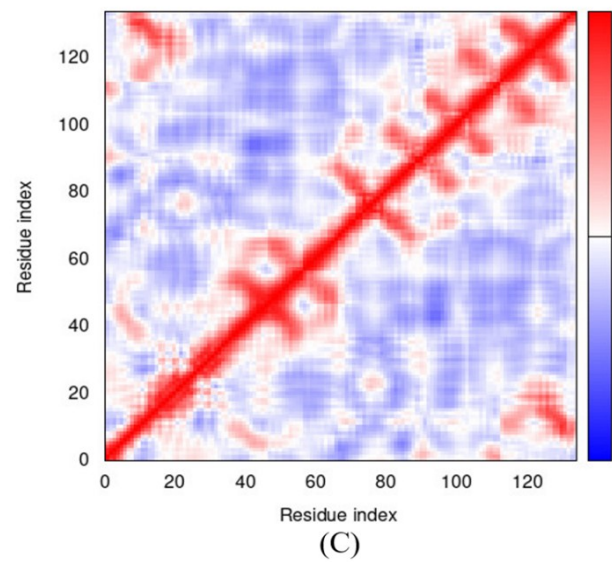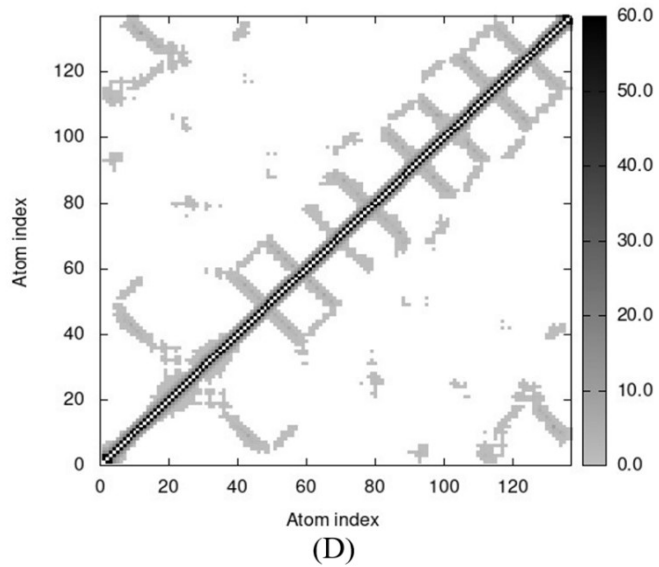



Figure S2: results of MD stimulation (A) Deformability and B-factor, (B) Eigenvalue and variance, (C) residue index, (D) atom index of 7JX2-(+)-N-methylisococlaurine

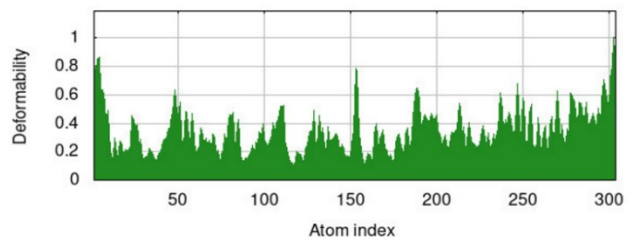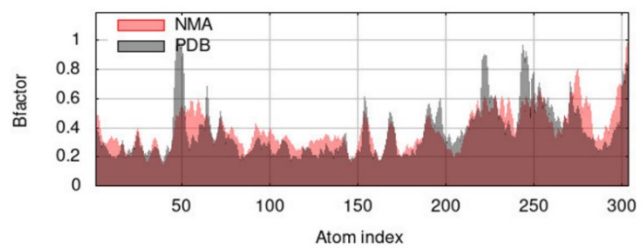

(A)

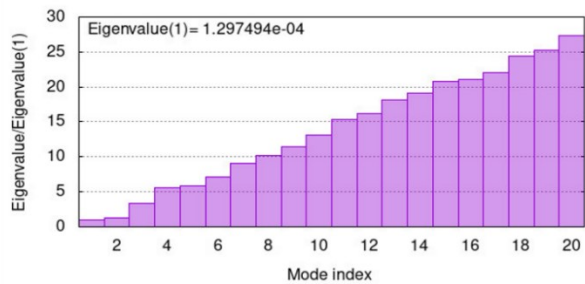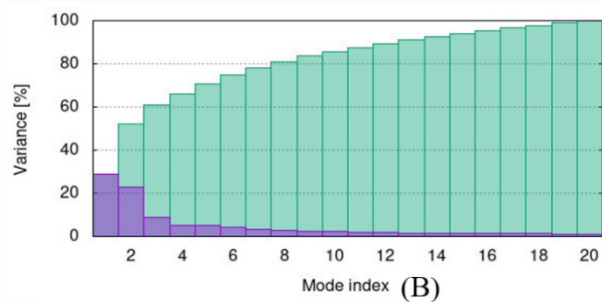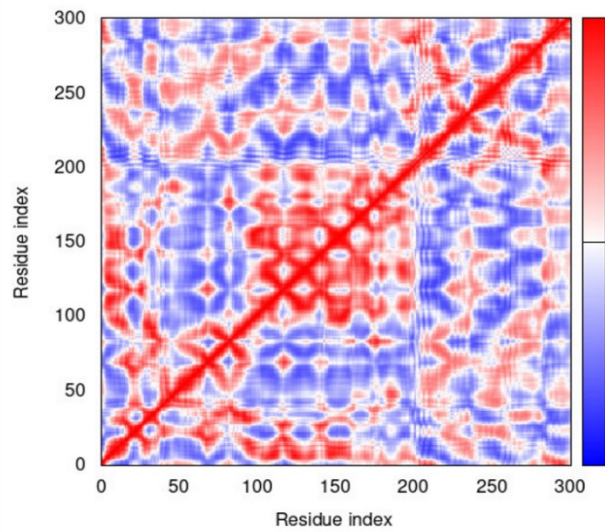

(C)

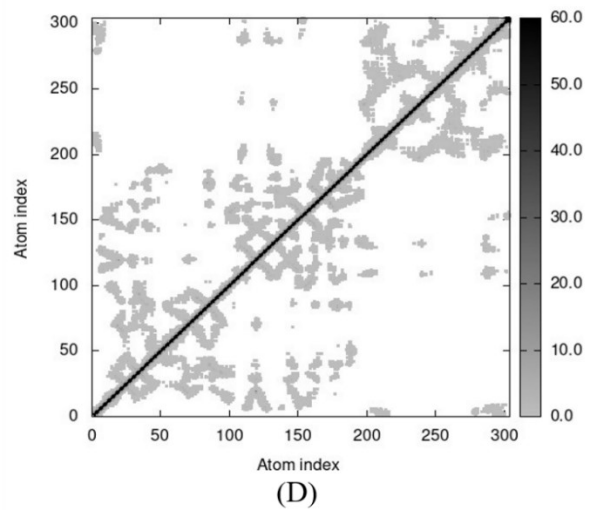

(D)

Figure S3: results of MD stimulation (A) Deformability and B-factor, (B) Eigenvalue and variance, (C) residue index, (D) atom index of 6W81- hymenocardine-H
